# Supplementary material for: Structure-Based Bioisosterism Design, Synthesis, Biological Activity and Toxicity of 1,2,4-Oxadiazole Substituted Benzamides Analogues Containing Pyrazole Rings
Source: MDPI journal article supplement (doi:10.3390/molecules27154692), 2022-07-22
Supplement: s1 [file s1]

# Supplementary Materials

Structure-Based Bioisosterism Design, Synthesis, Biological Activity and Toxicity of 1,2,4-Oxadiazole Substituted Benzamides Analogues Containing Pyrazole Rings

Min-Ting Tu, Ying-Ying Shao, Sen Yang, Bin-Long Sun, Ying-Ying Wang,  
Cheng-Xia Tan \* and Xue-Dong Wang\*

|                                                        |         |
|--------------------------------------------------------|---------|
| 1. $^1\text{H}$ NMR spectra of <b>14a~14s</b> .....    | S1-S19  |
| 2. $^{13}\text{C}$ NMR spectra of <b>14a~14s</b> ..... | S20-S38 |
| 3. ESI-HRMS spectra of <b>14a~14s</b> .....            | S39-S57 |

## 1. $^1\text{H}$ NMR spectra of 14a~14s

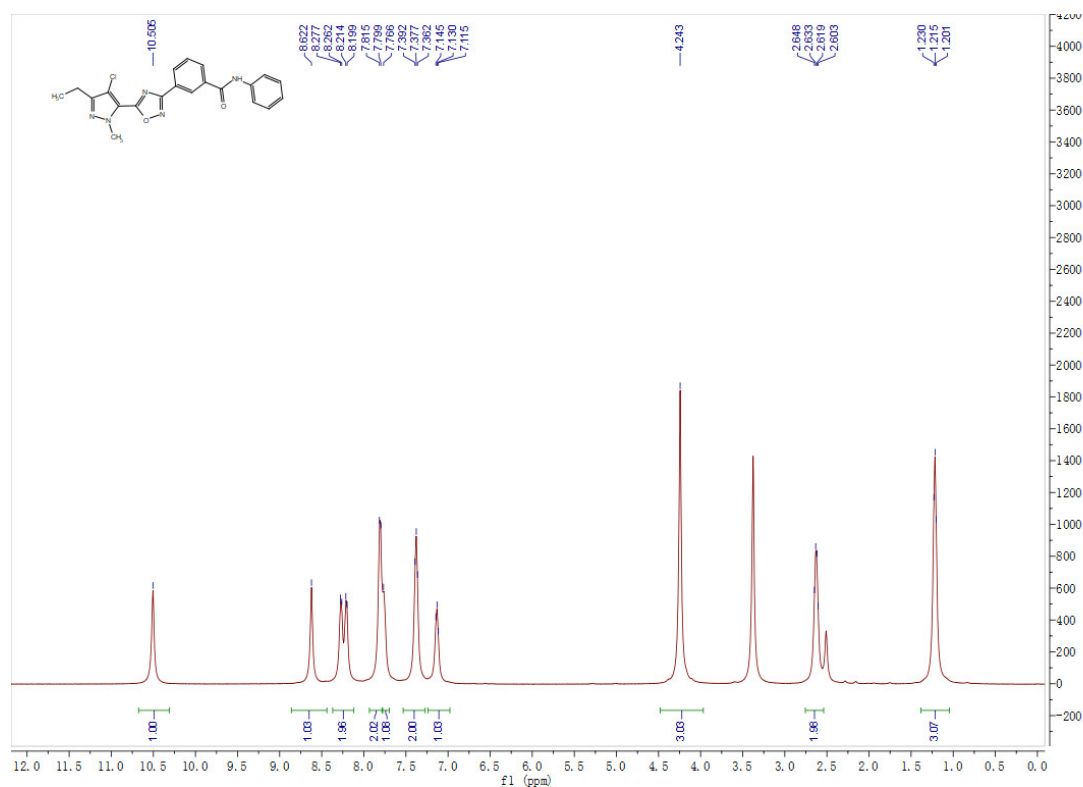

Figure S1.  $^1\text{H}$  NMR spectra of 14a

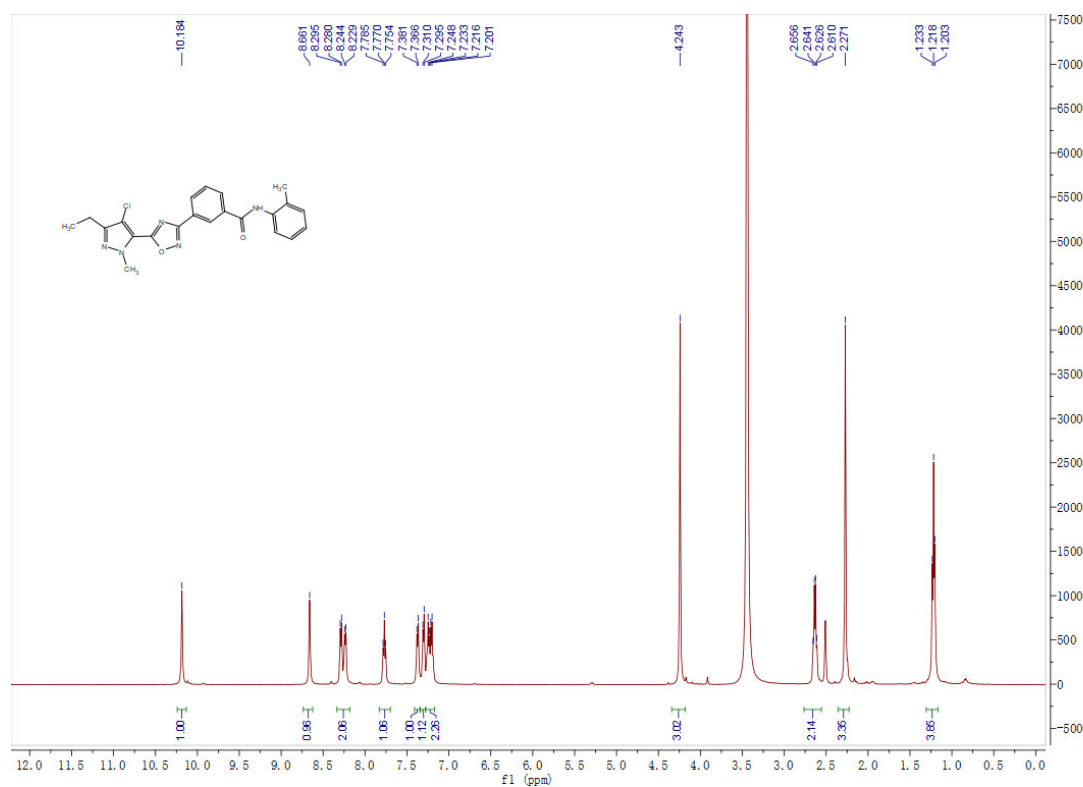

Figure S2.  $^1\text{H}$  NMR spectra of 14b

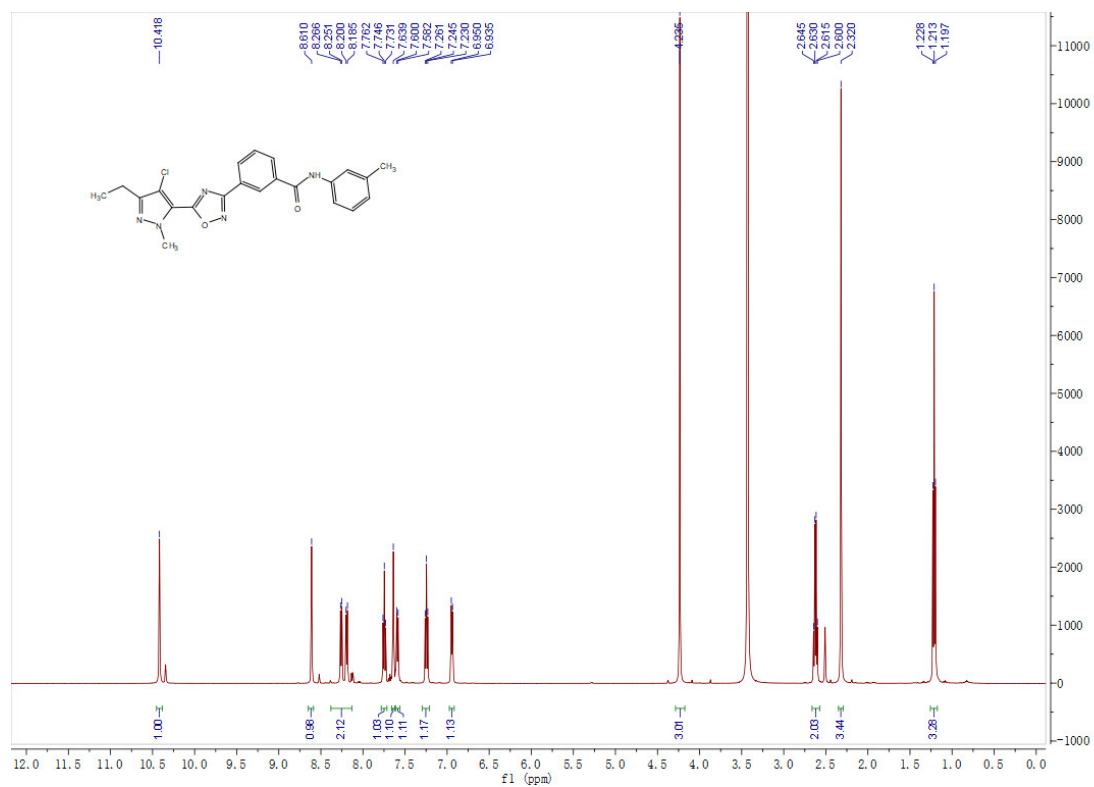

Figure S3. <sup>1</sup>H NMR spectra of 14c

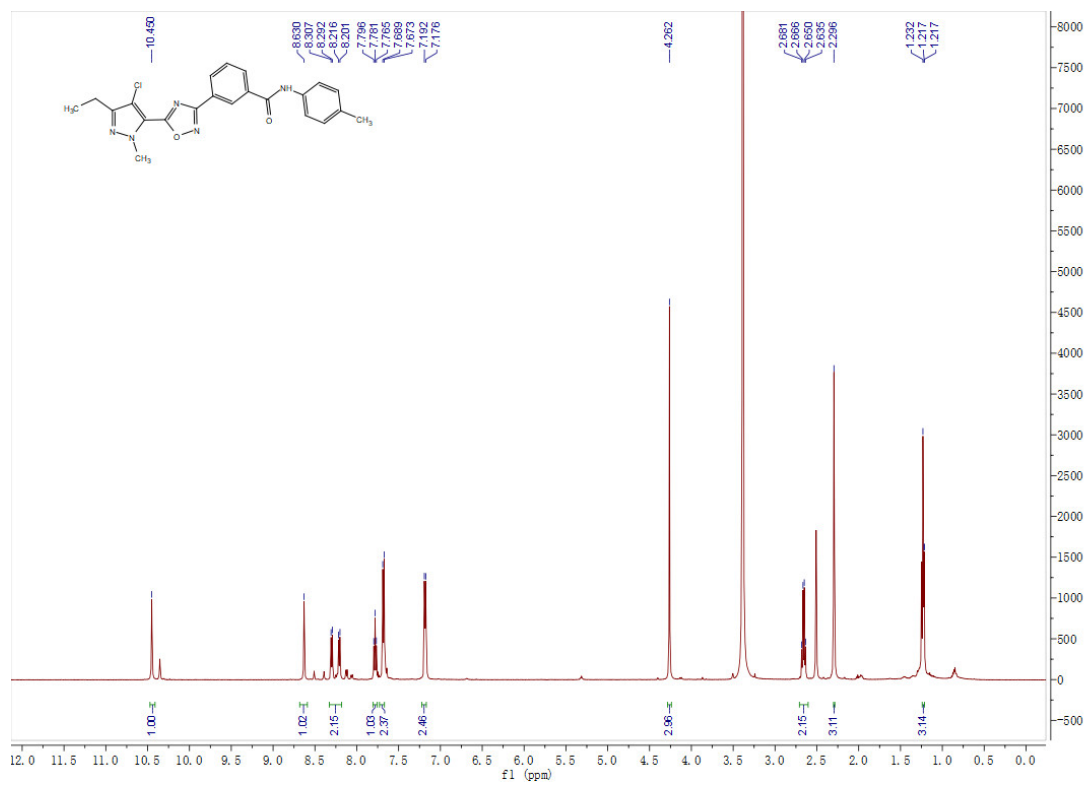

Figure S4. <sup>1</sup>H NMR spectra of 14d

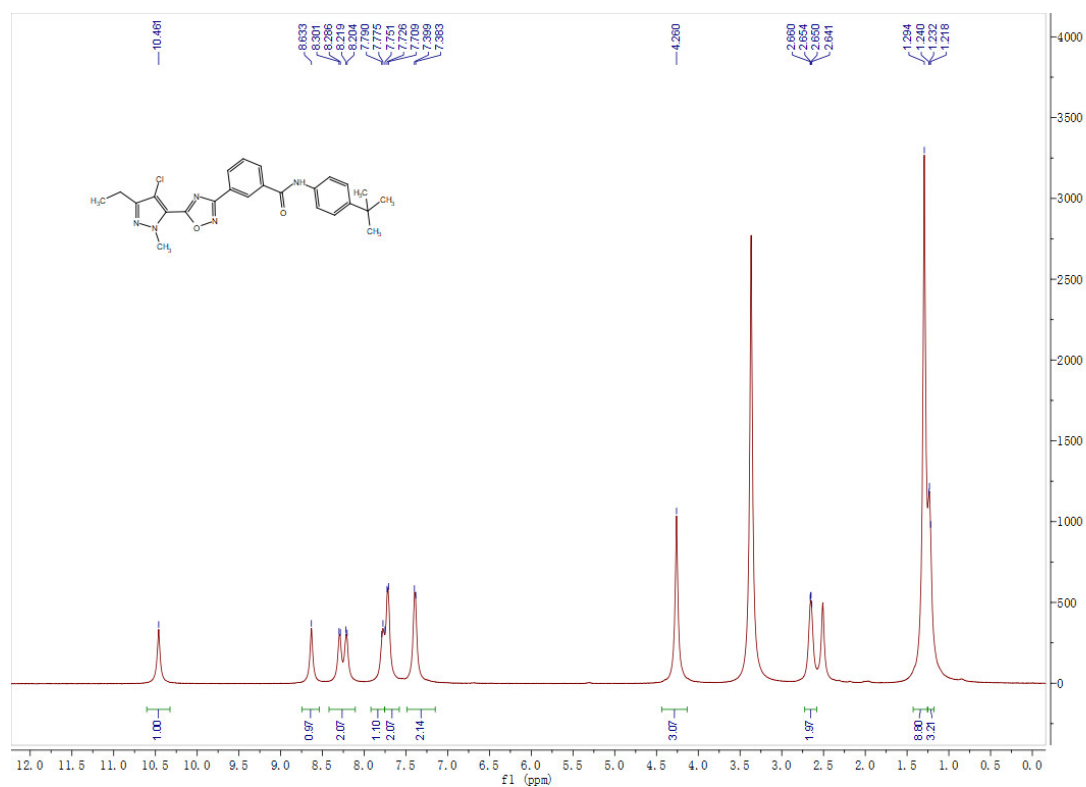

Figure S5. <sup>1</sup>H NMR spectra of 14e

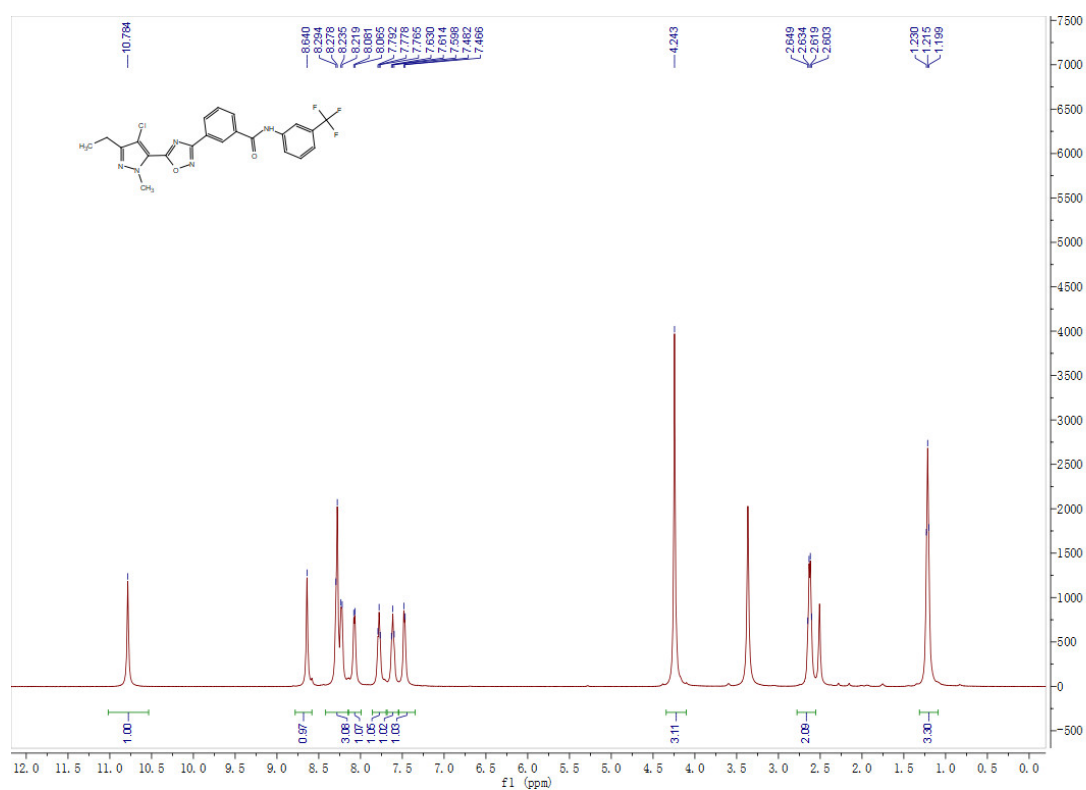

Figure S6. <sup>1</sup>H NMR spectra of 14f

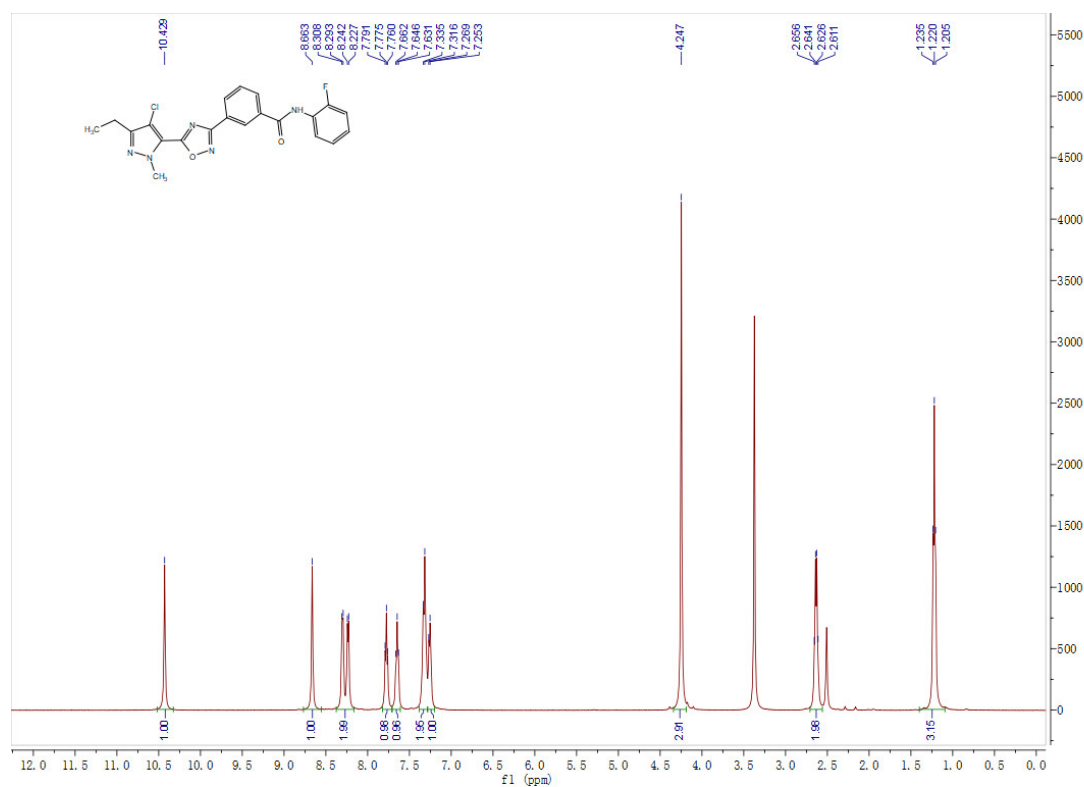

Figure S7. <sup>1</sup>H NMR spectra of 14g

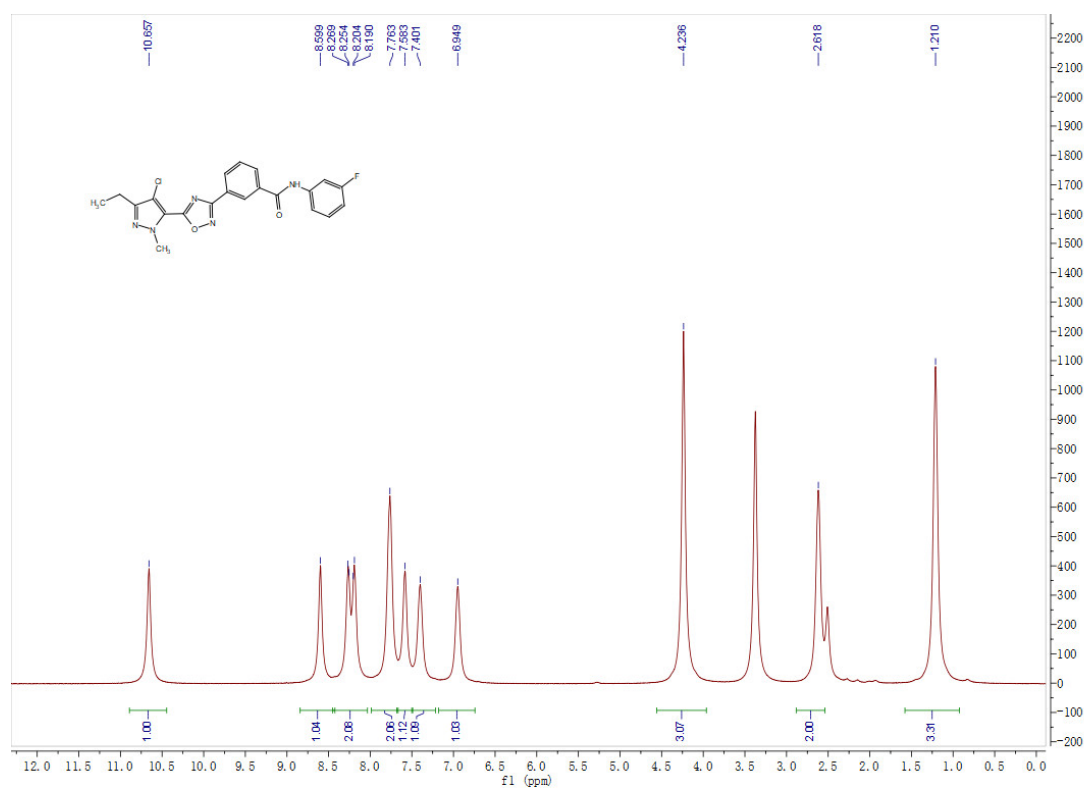

Figure S8. <sup>1</sup>H NMR spectra of 14h

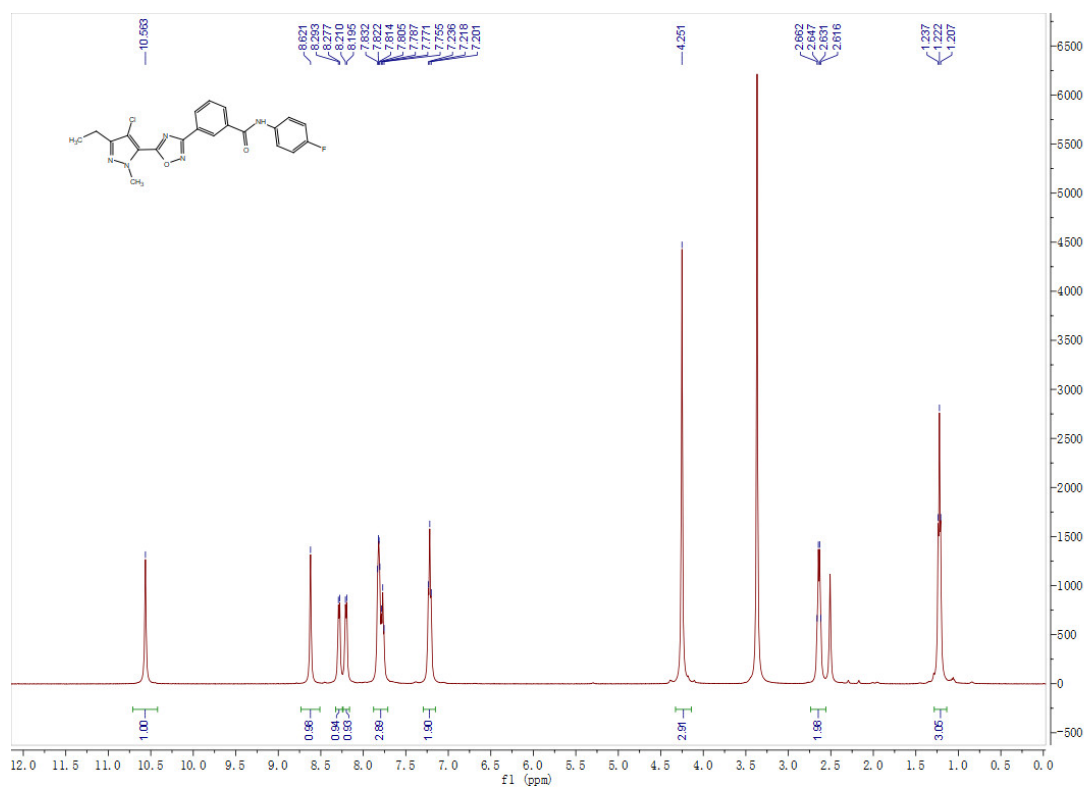

Figure S9. <sup>1</sup>H NMR spectra of 14i

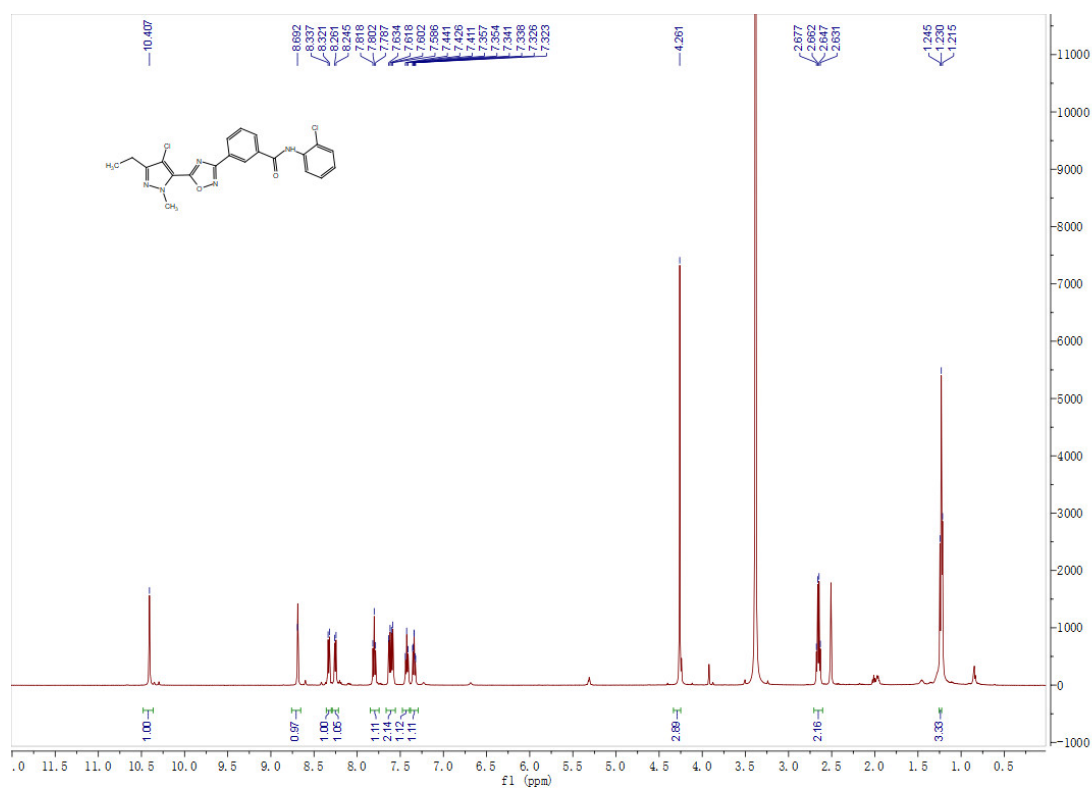

Figure S10. <sup>1</sup>H NMR spectra of 14j

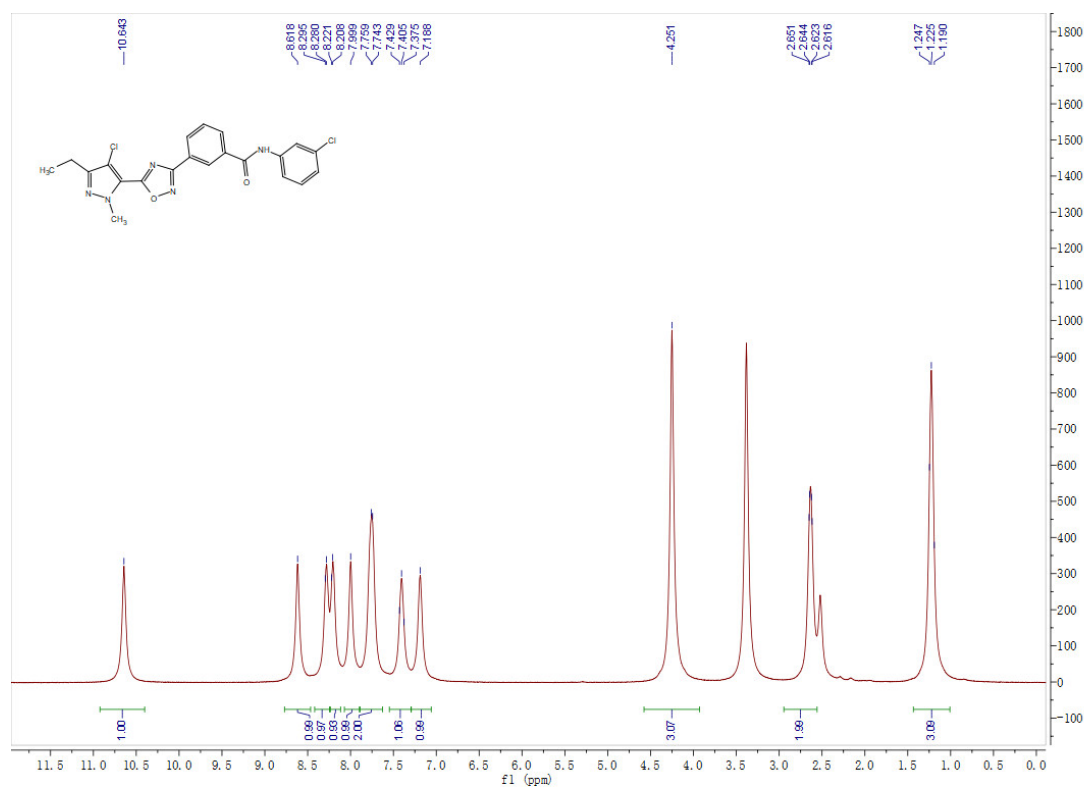

Figure S11. <sup>1</sup>H NMR spectra of 14k

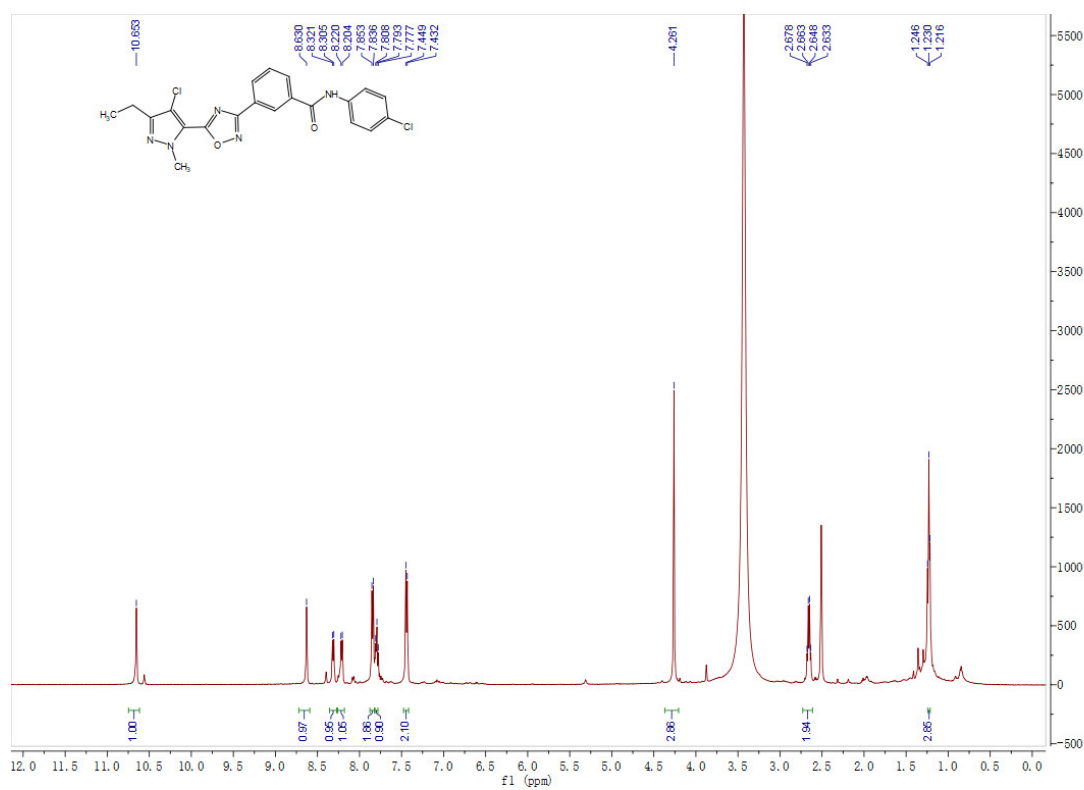

Figure S12. <sup>1</sup>H NMR spectra of 14l

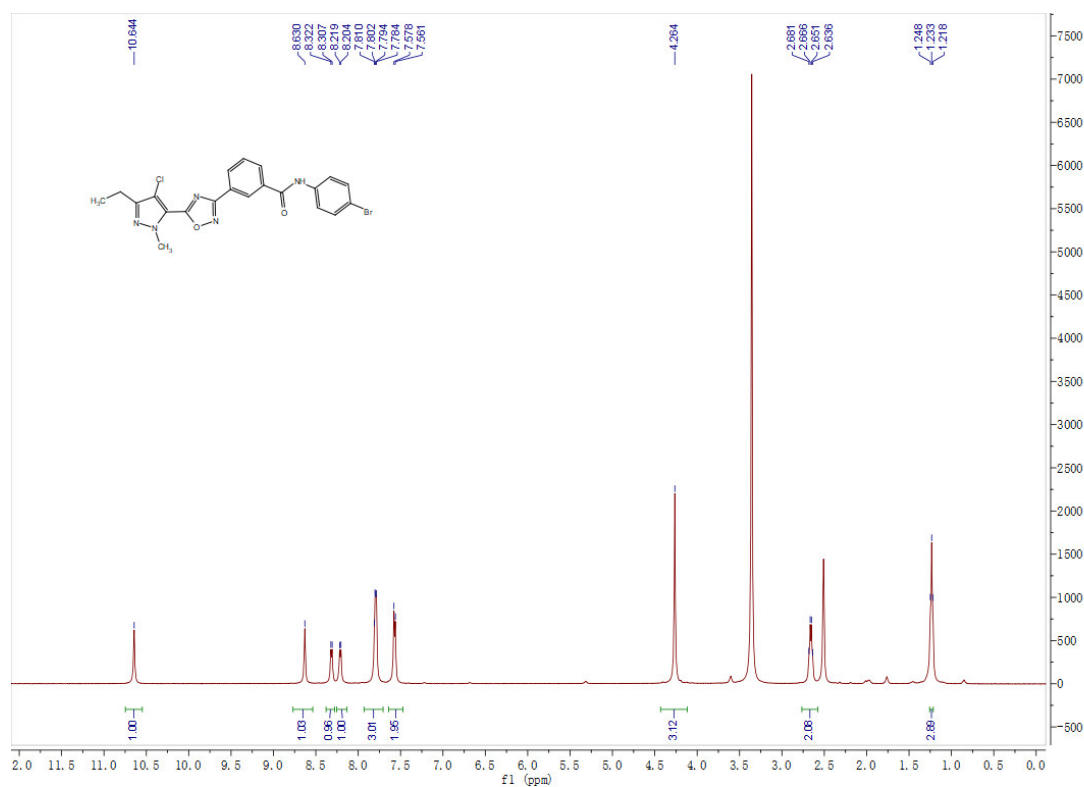

Figure S13. <sup>1</sup>H NMR spectra of 14m

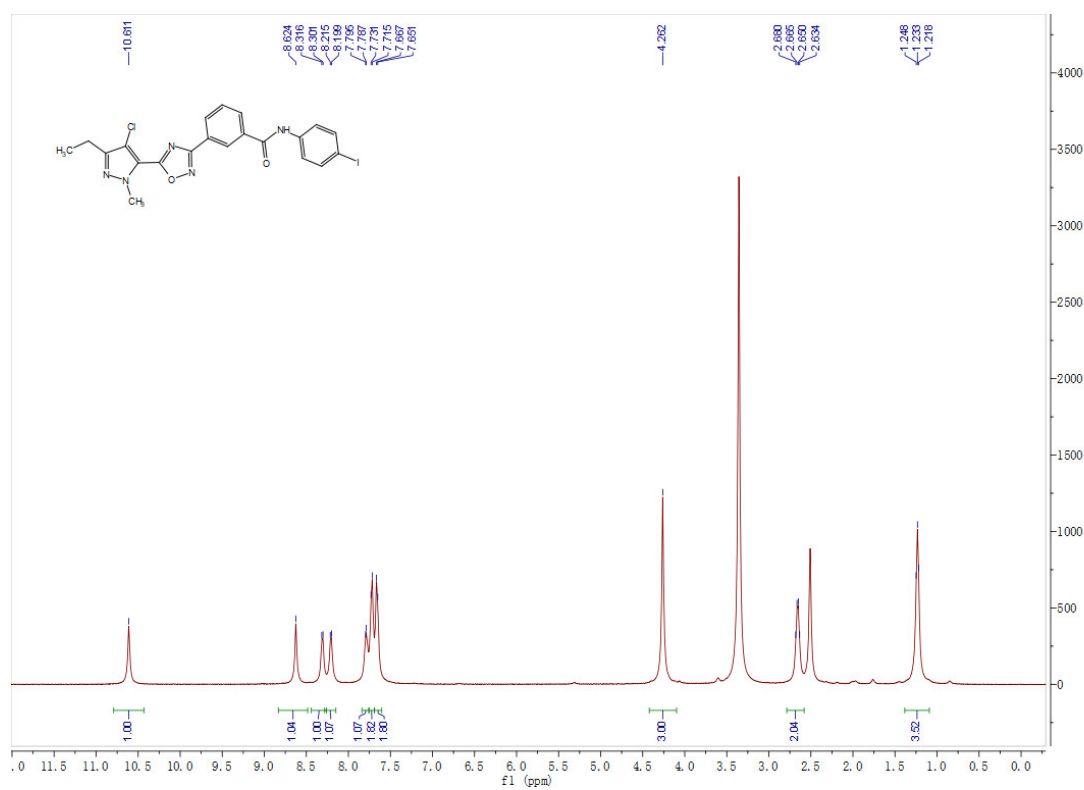

Figure S14. <sup>1</sup>H NMR spectra of 14n



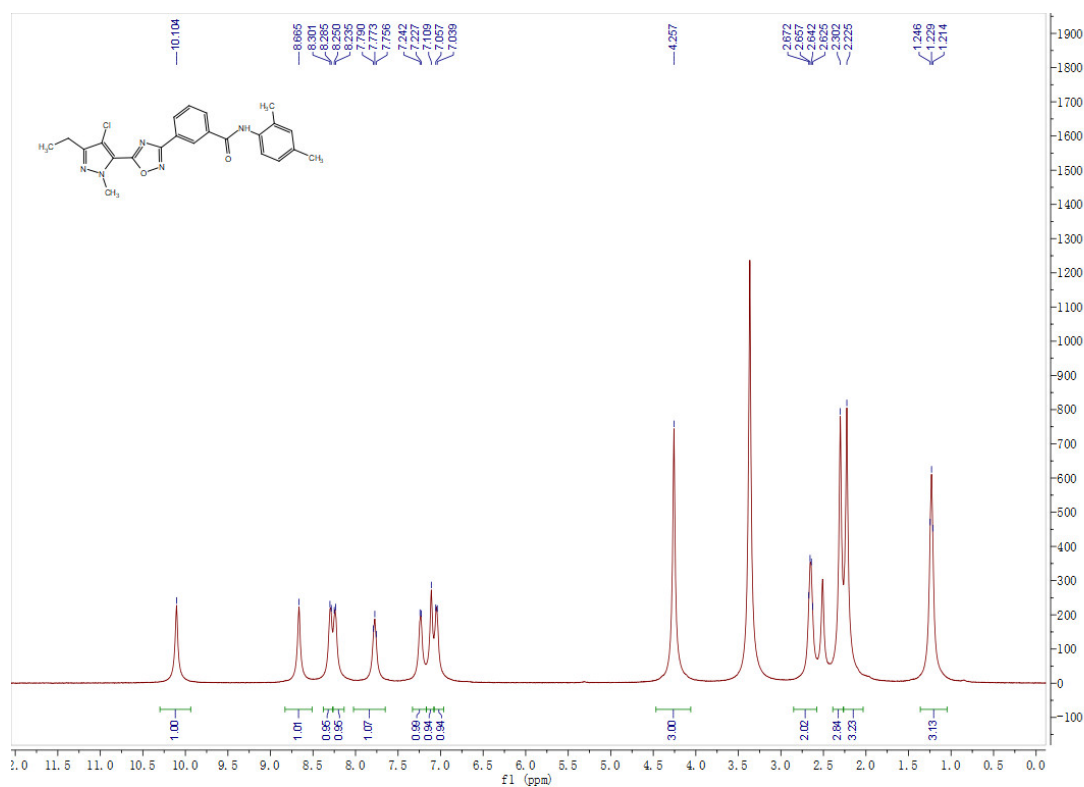

Figure S15. <sup>1</sup>H NMR spectra of 14o

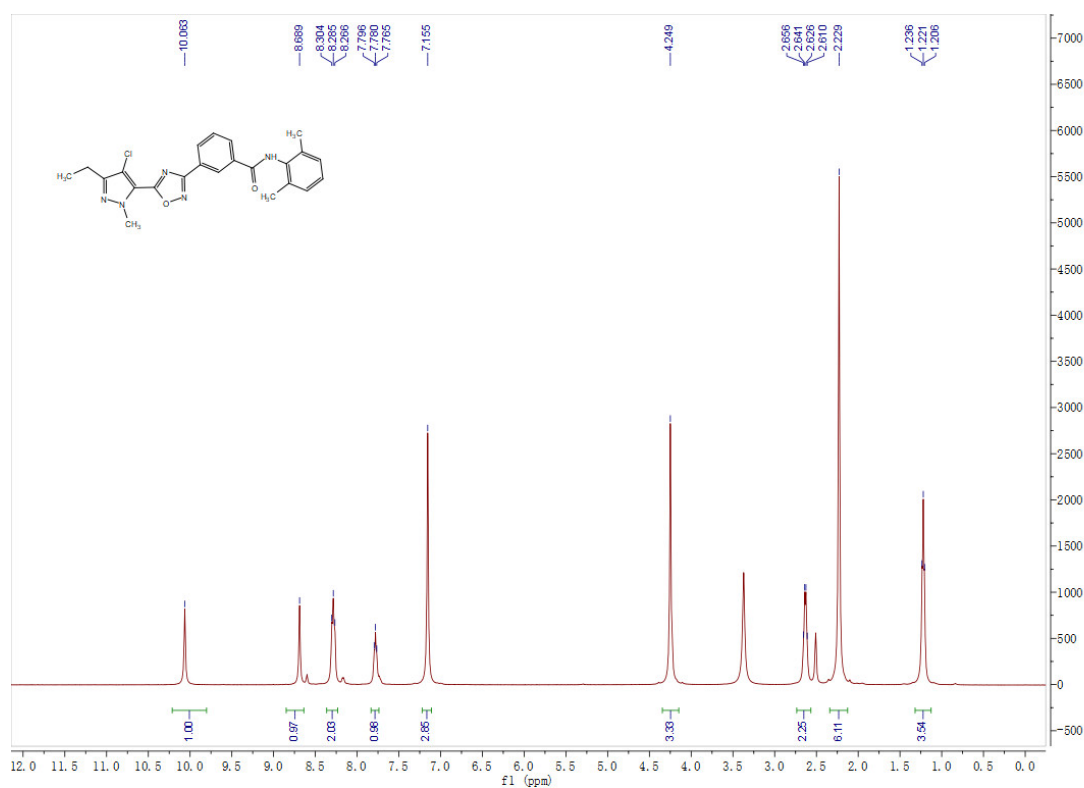

Figure S16. <sup>1</sup>H NMR spectra of 14p

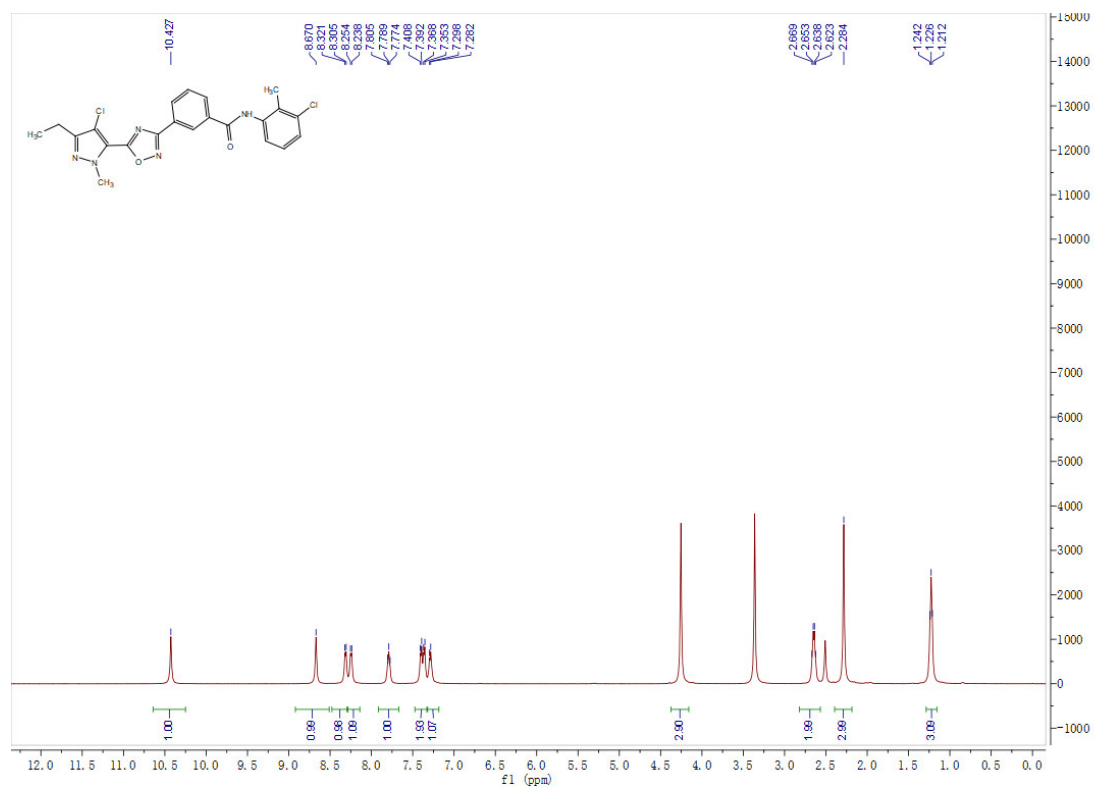

Figure S17. <sup>1</sup>H NMR spectra of 14q

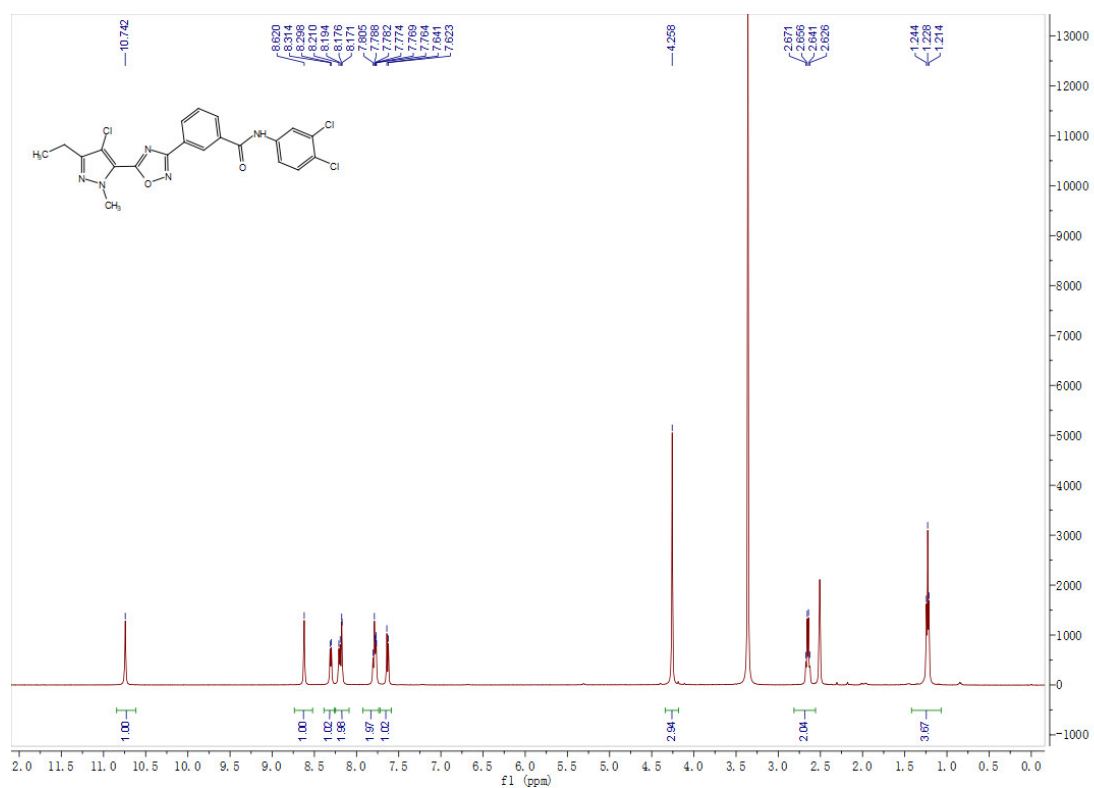

Figure S18. <sup>1</sup>H NMR spectra of 14r

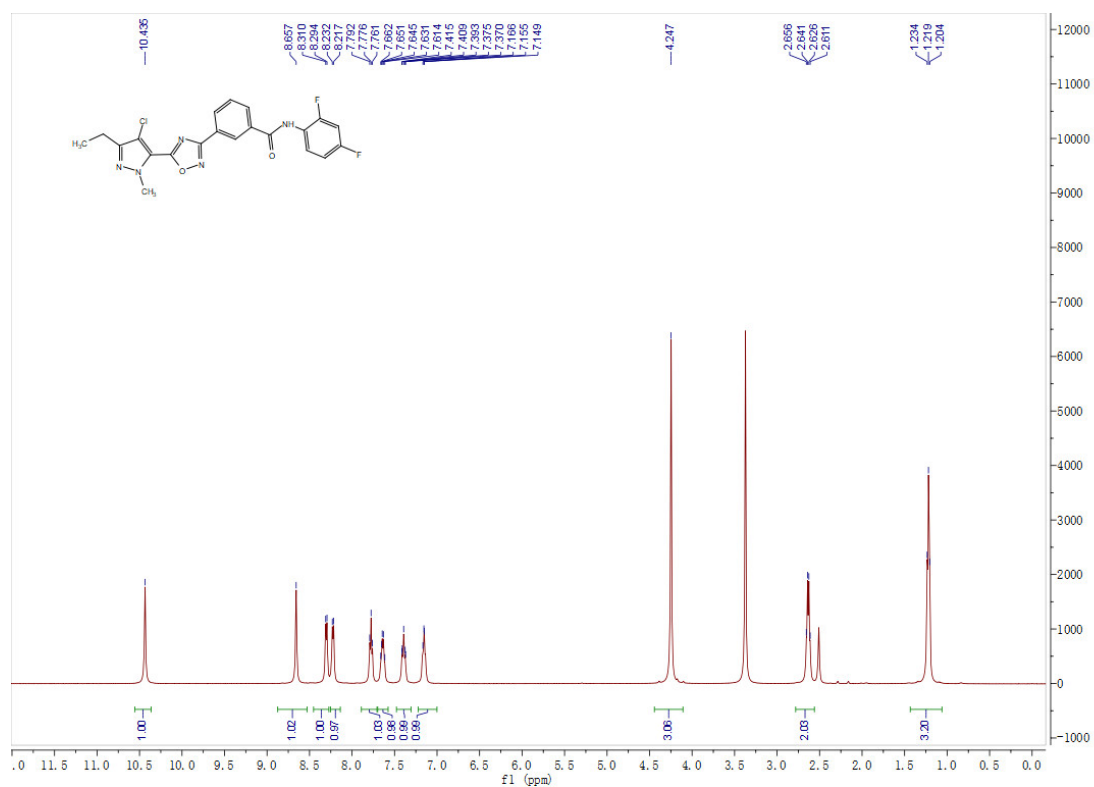

Figure S19. <sup>1</sup>H NMR spectra of 14s

## 2. <sup>13</sup>C NMR spectra of 14a~14s

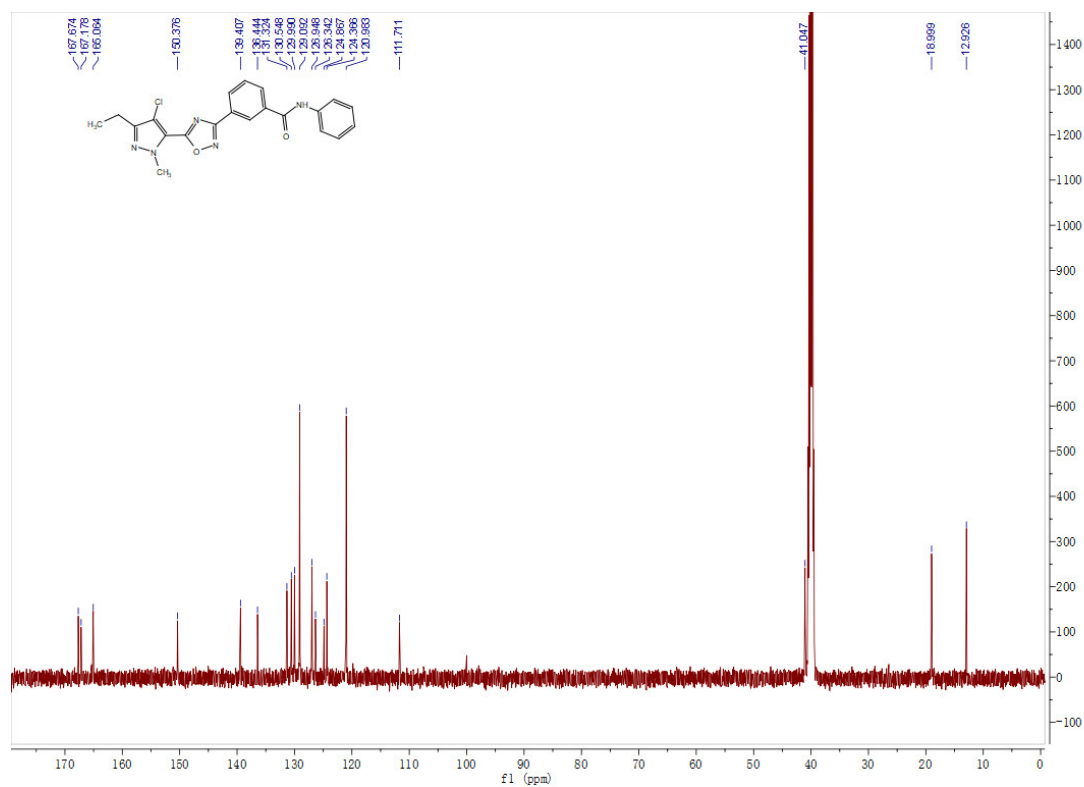

Figure S20. <sup>13</sup>C NMR spectra of 14a

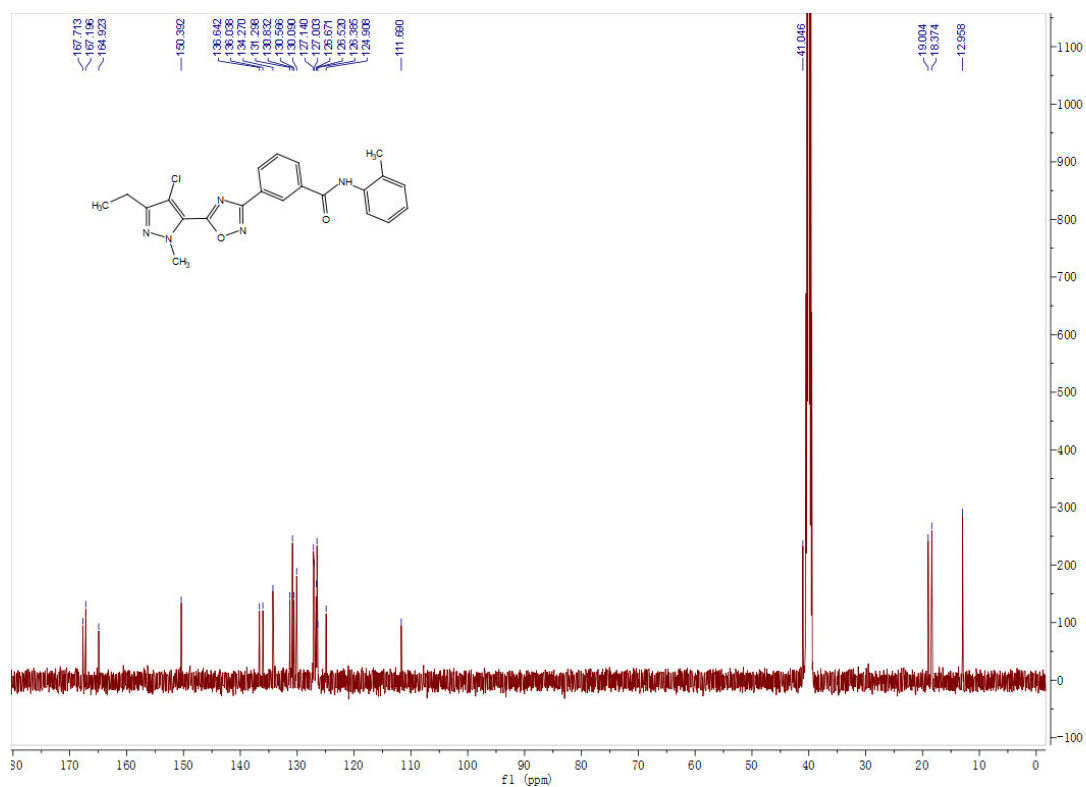

Figure S21. <sup>13</sup>C NMR spectra of 14b

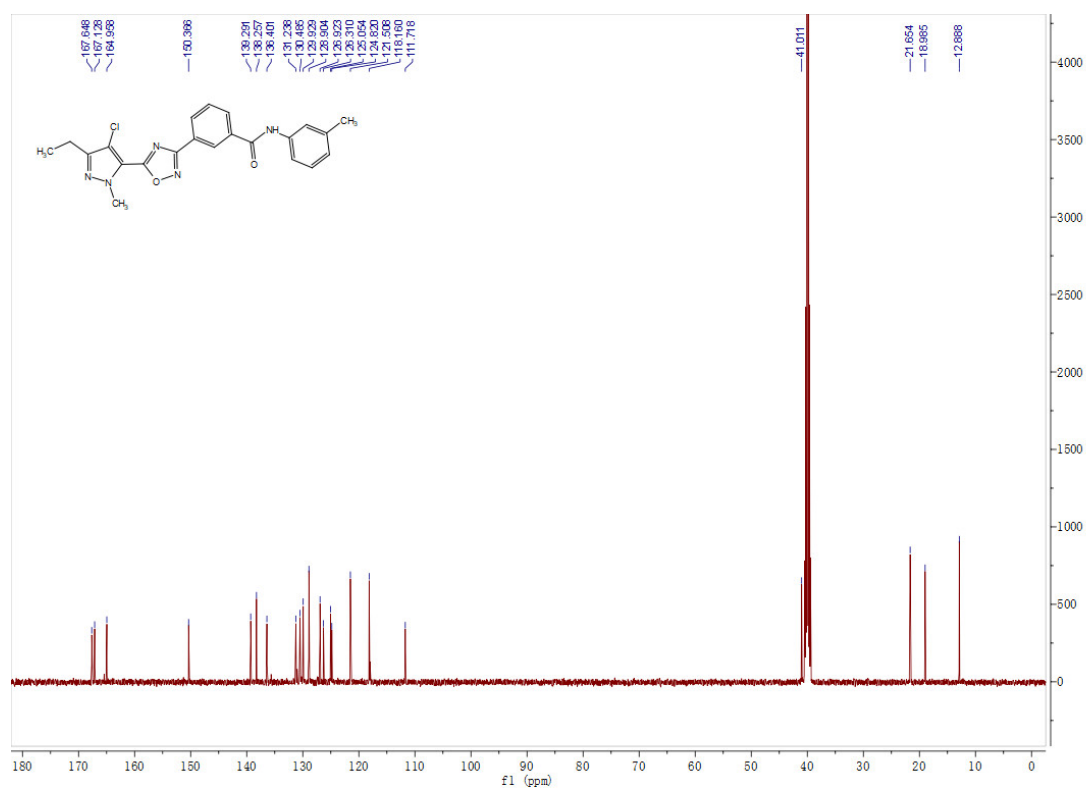

Figure S22. <sup>13</sup>C NMR spectra of 14c

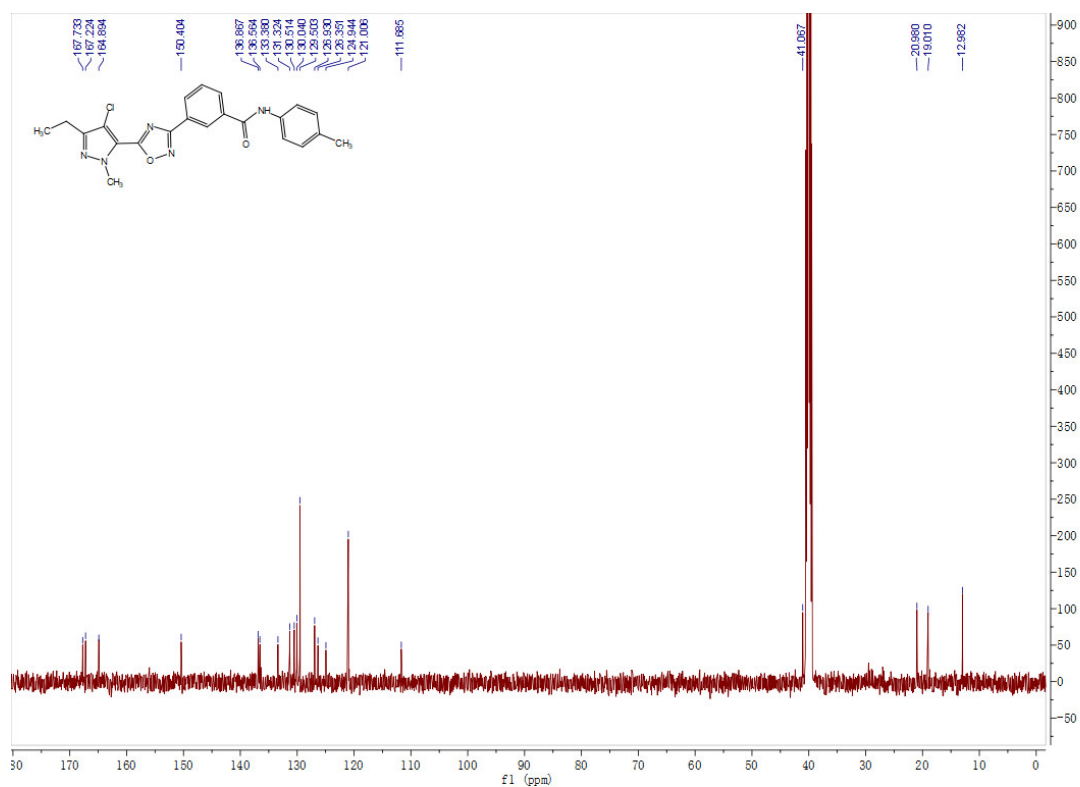

Figure S23. <sup>13</sup>C NMR spectra of 14d

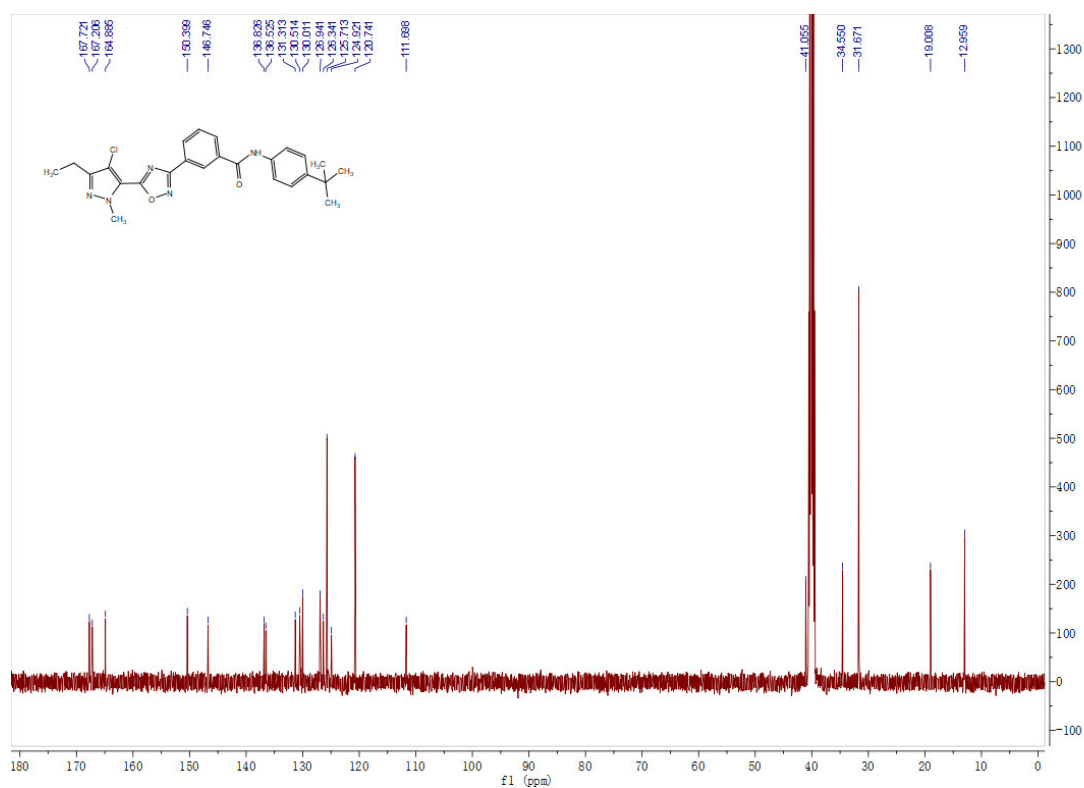

Figure S24. <sup>13</sup>C NMR spectra of 14e

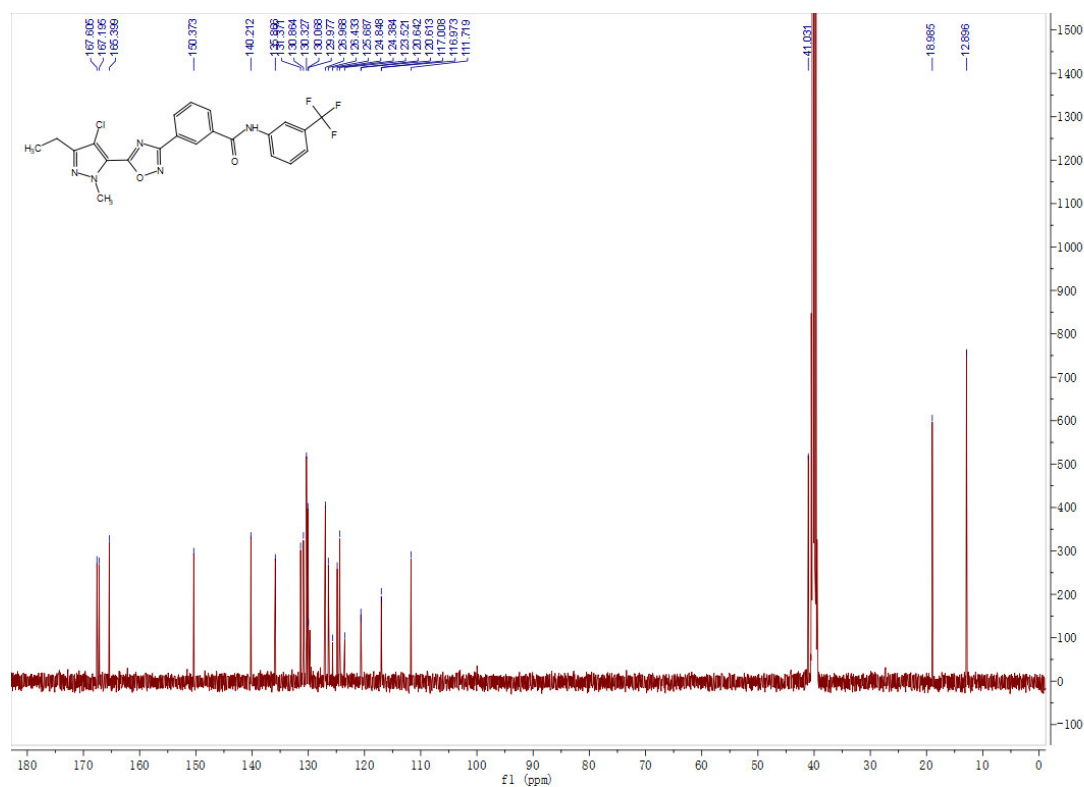

Figure S25. <sup>13</sup>C NMR spectra of 14f

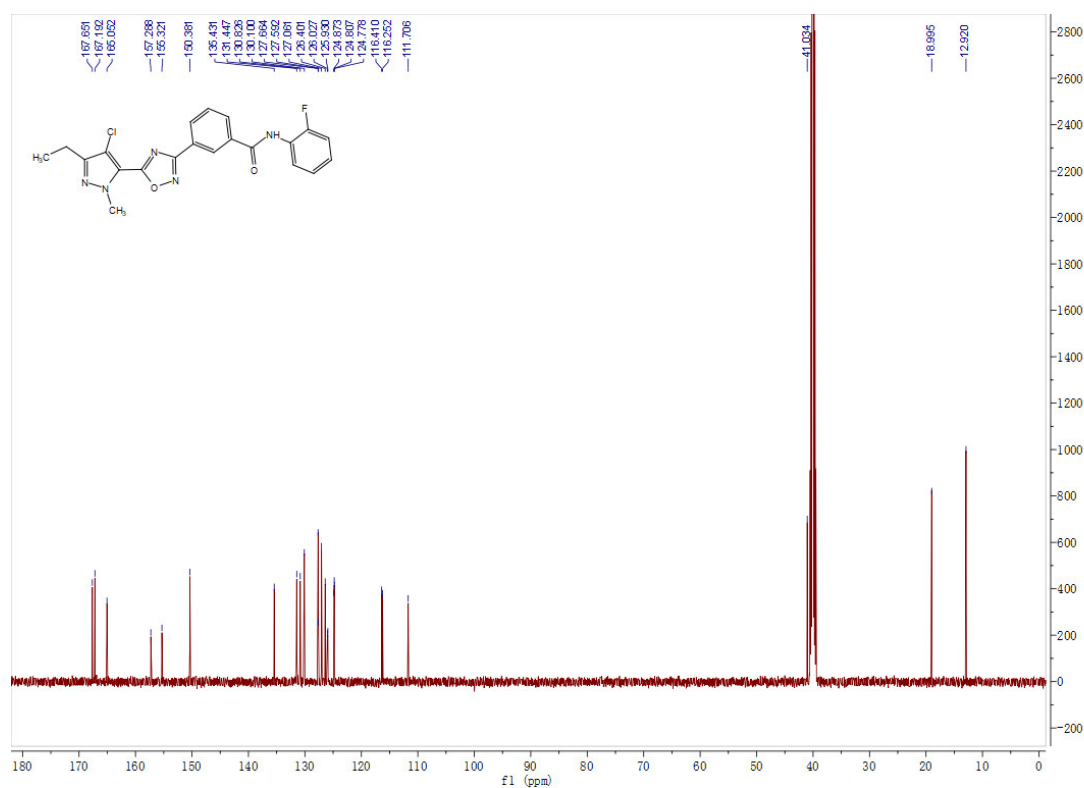

Figure S26. <sup>13</sup>C NMR spectra of 14g

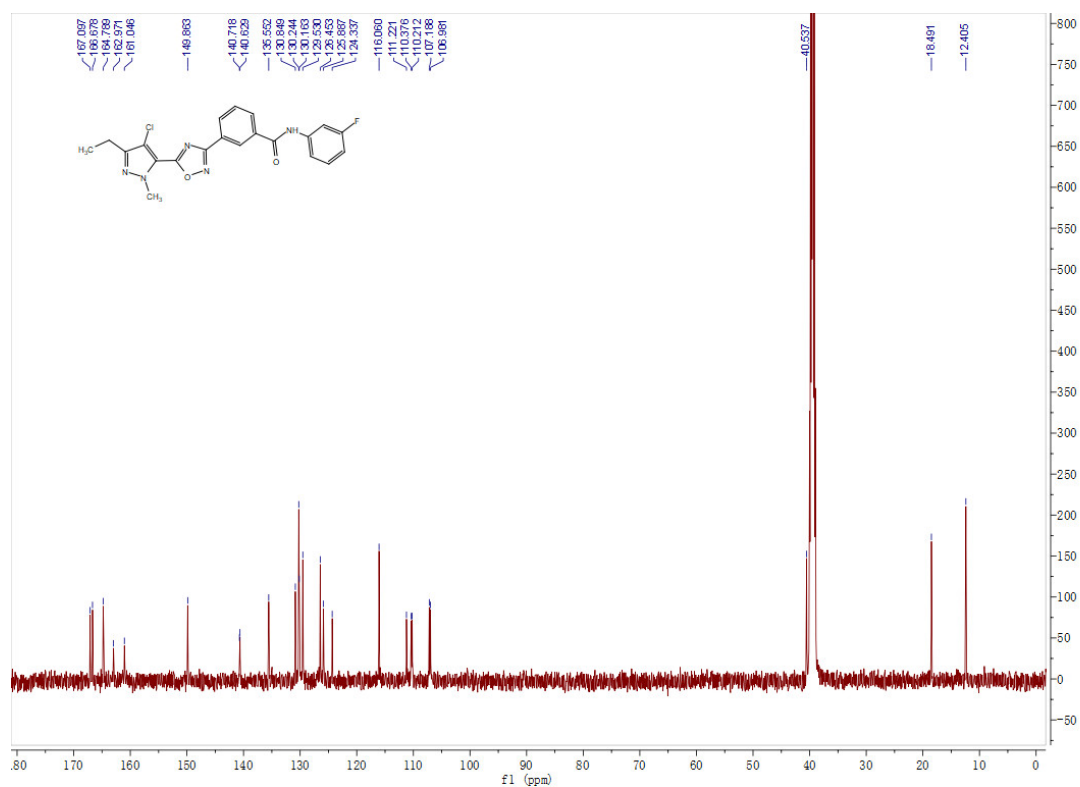

Figure S27. <sup>13</sup>C NMR spectra of 14h

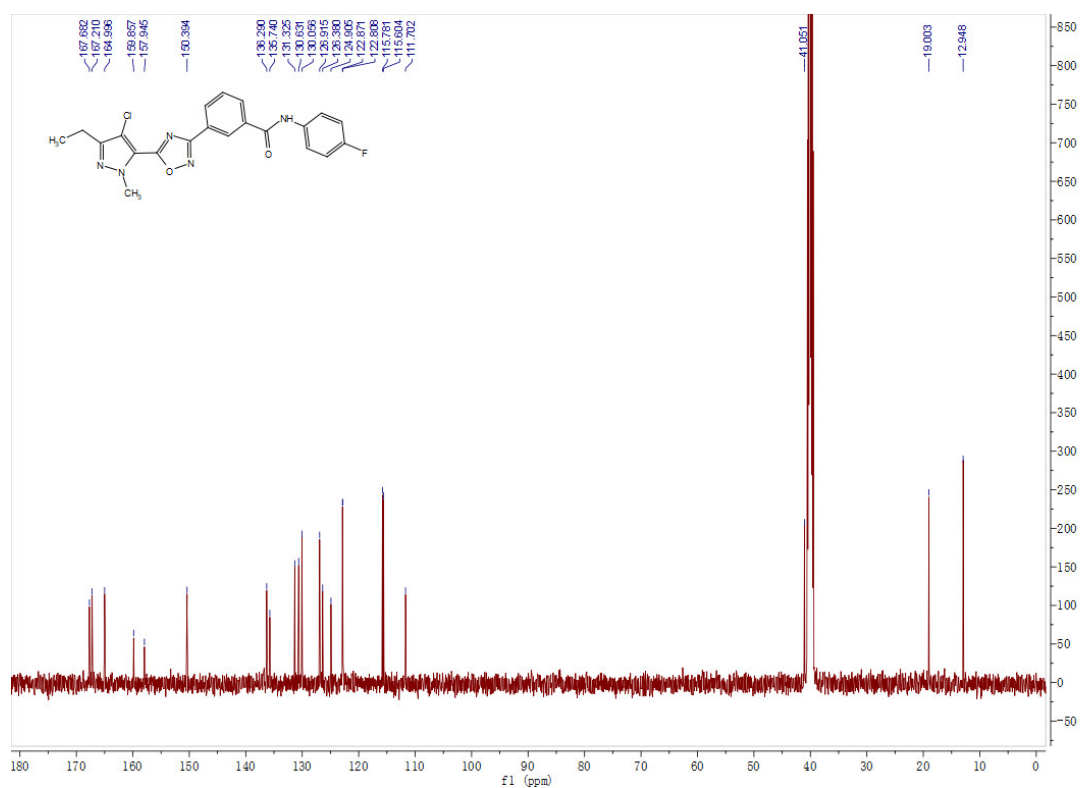

Figure S28. <sup>13</sup>C NMR spectra of 14i

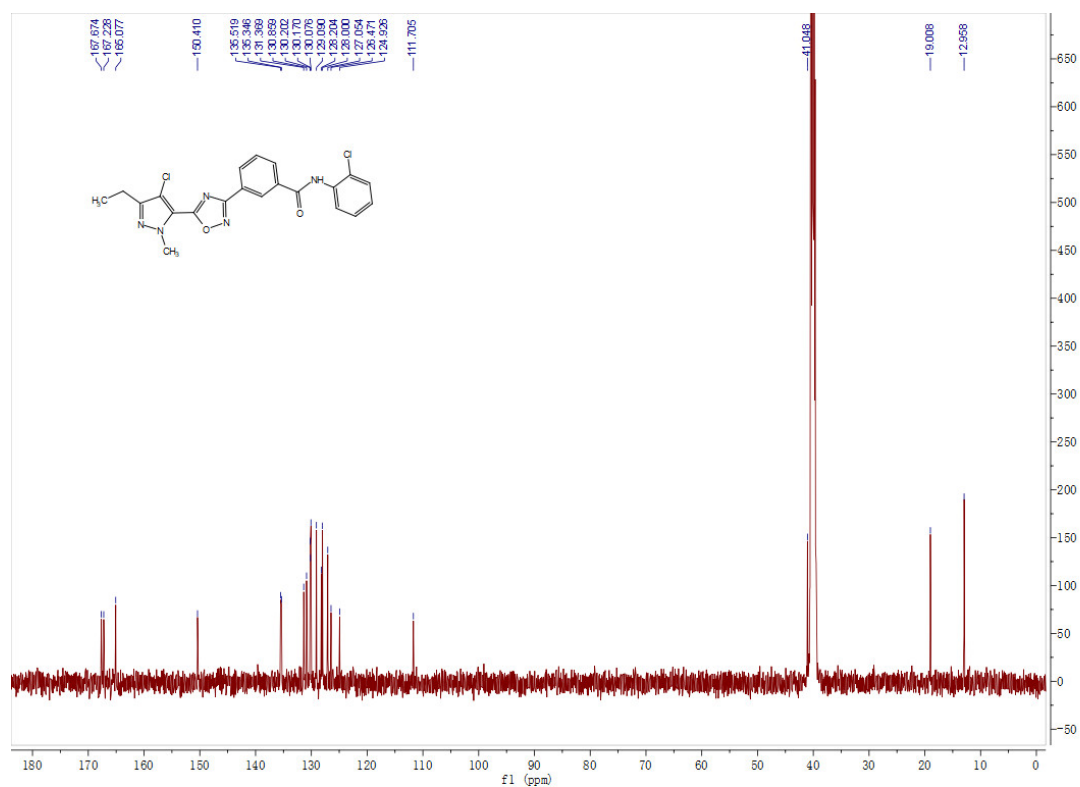

Figure S29. <sup>13</sup>C NMR spectra of 14j

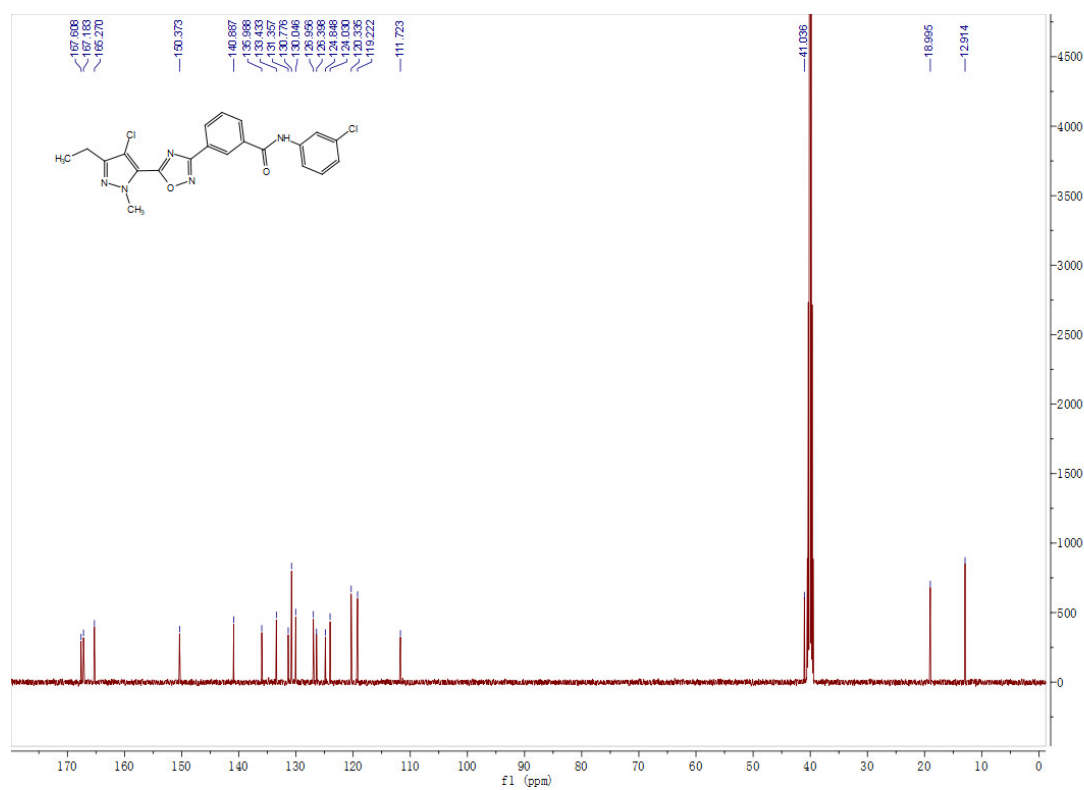

Figure S30. <sup>13</sup>C NMR spectra of 14k



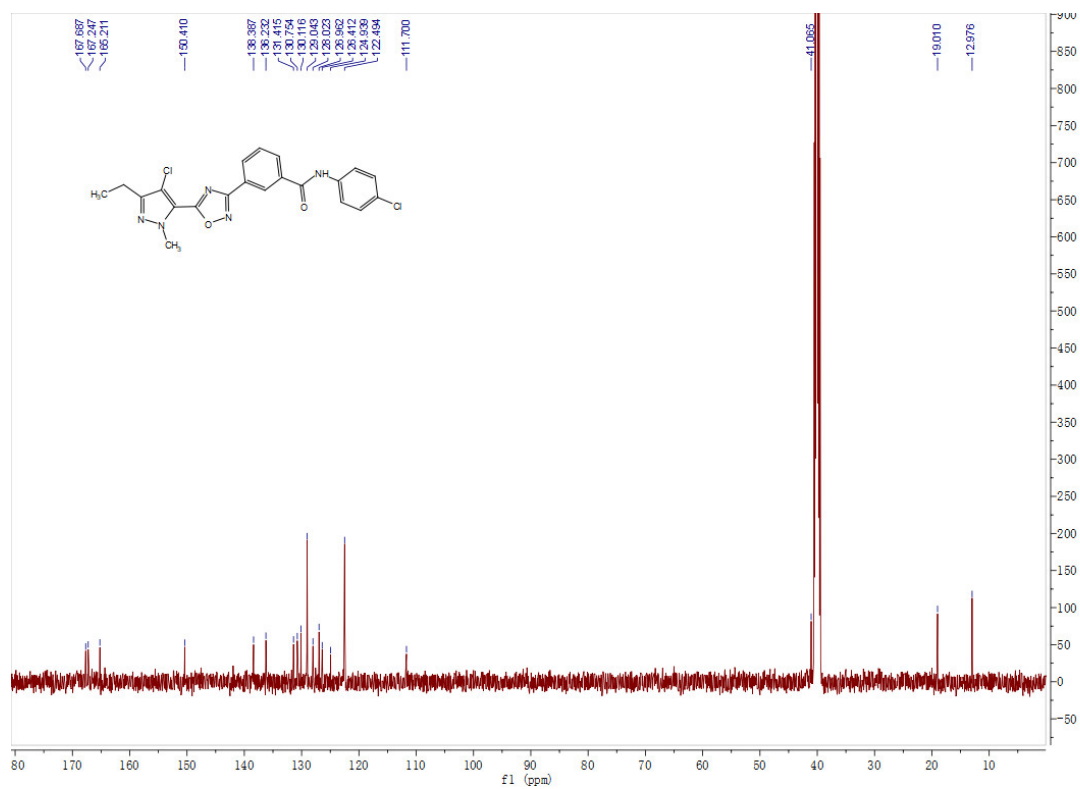

Figure S31. <sup>13</sup>C NMR spectra of 14l

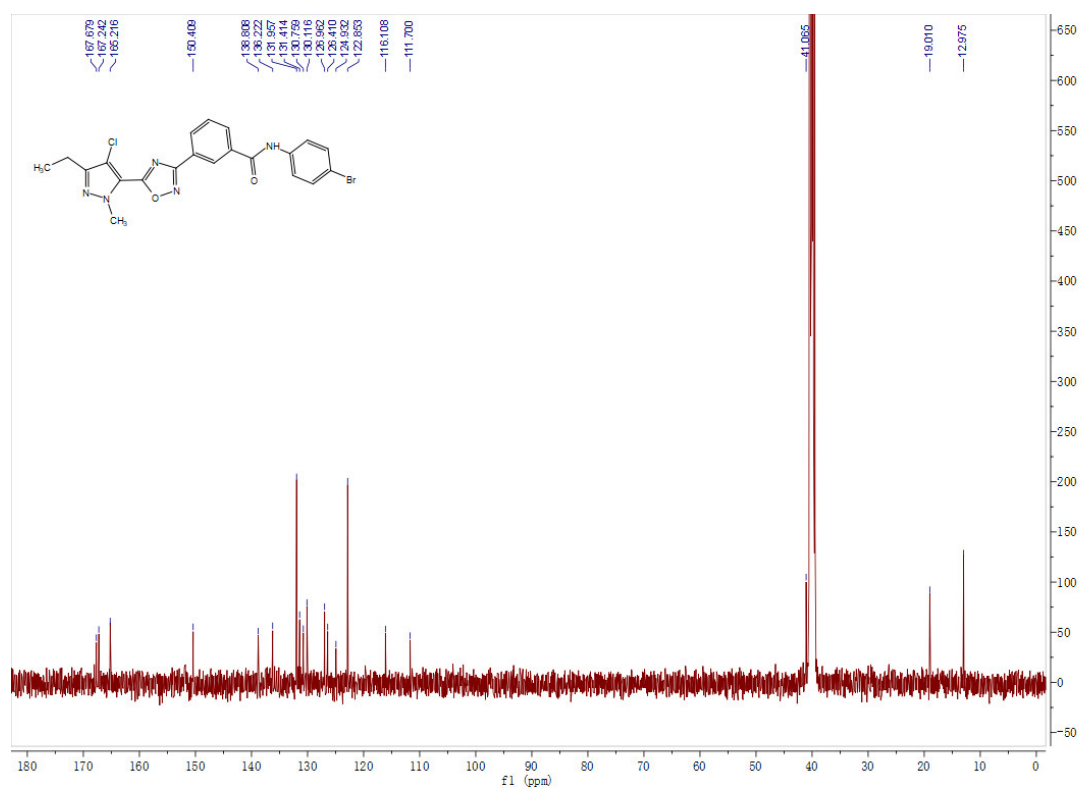

Figure S32. <sup>13</sup>C NMR spectra of 14m

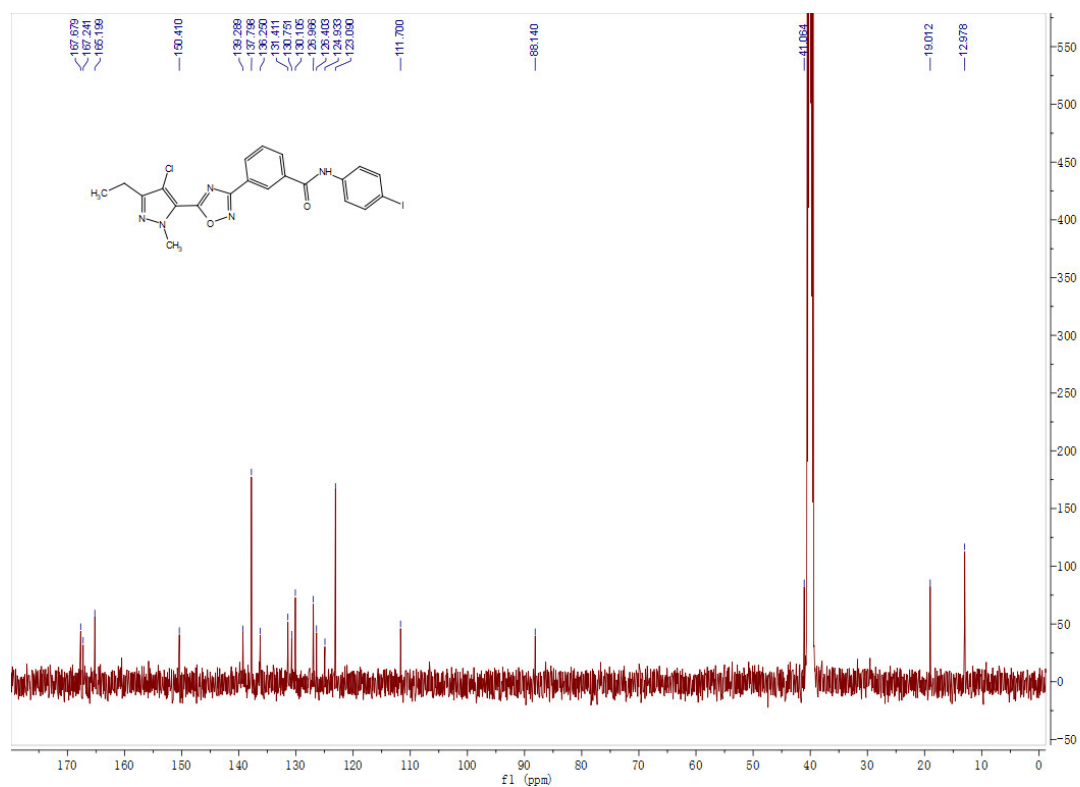

Figure S33. <sup>13</sup>C NMR spectra of 14n

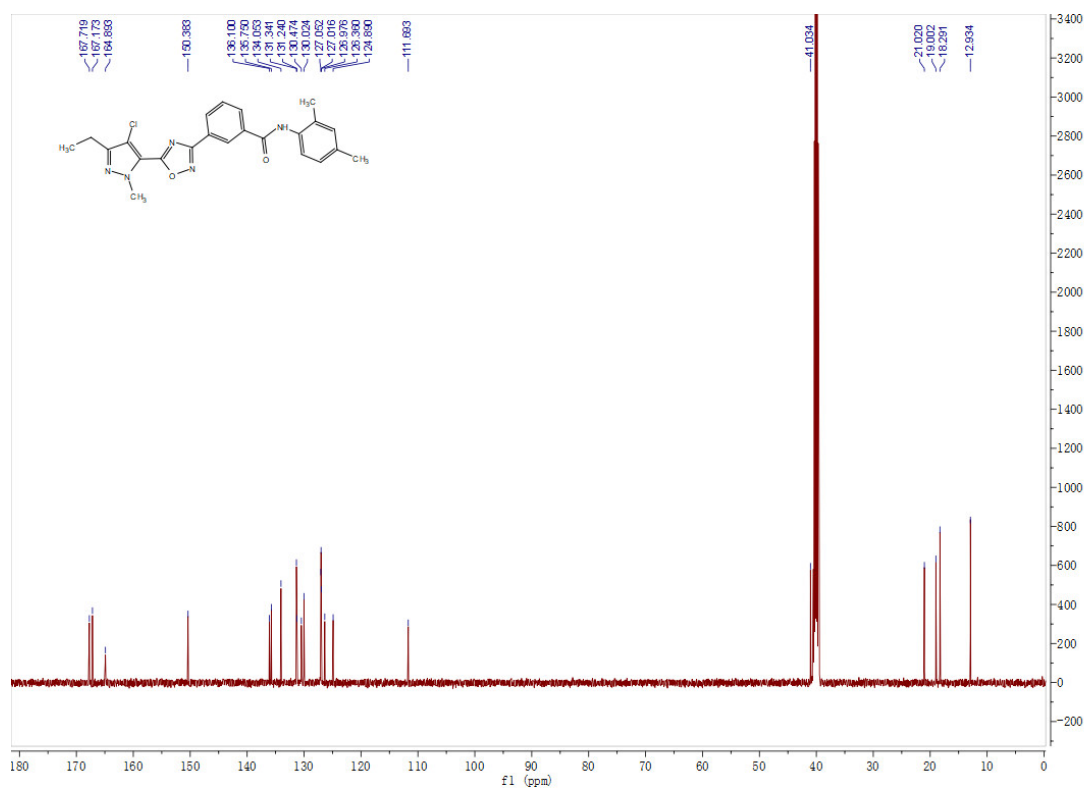

Figure S34. <sup>13</sup>C NMR spectra of 14o

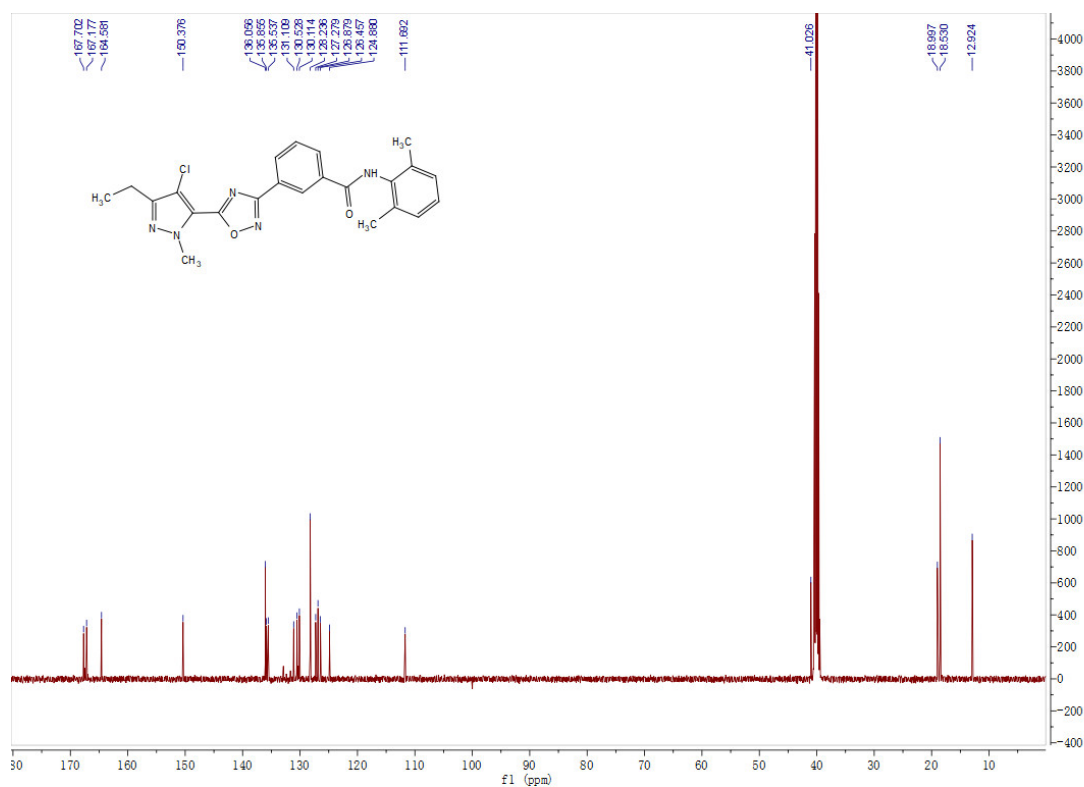

Figure S35. <sup>13</sup>C NMR spectra of 14p

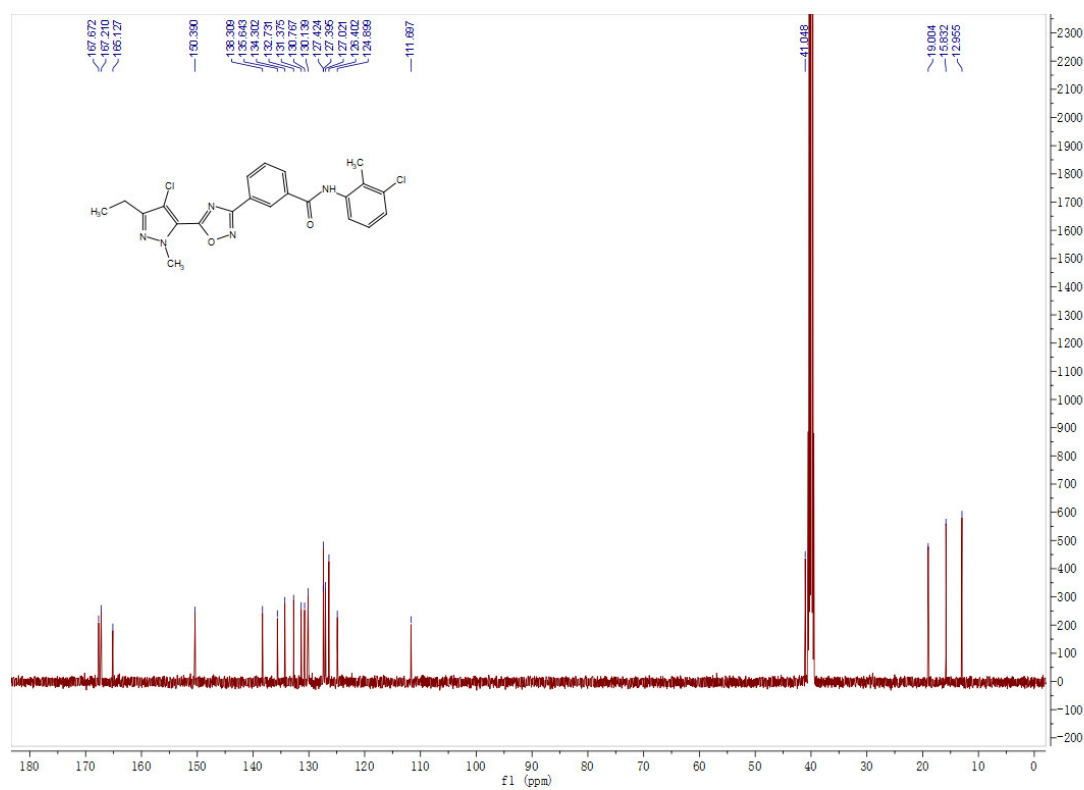

Figure S36. <sup>13</sup>C NMR spectra of 14q

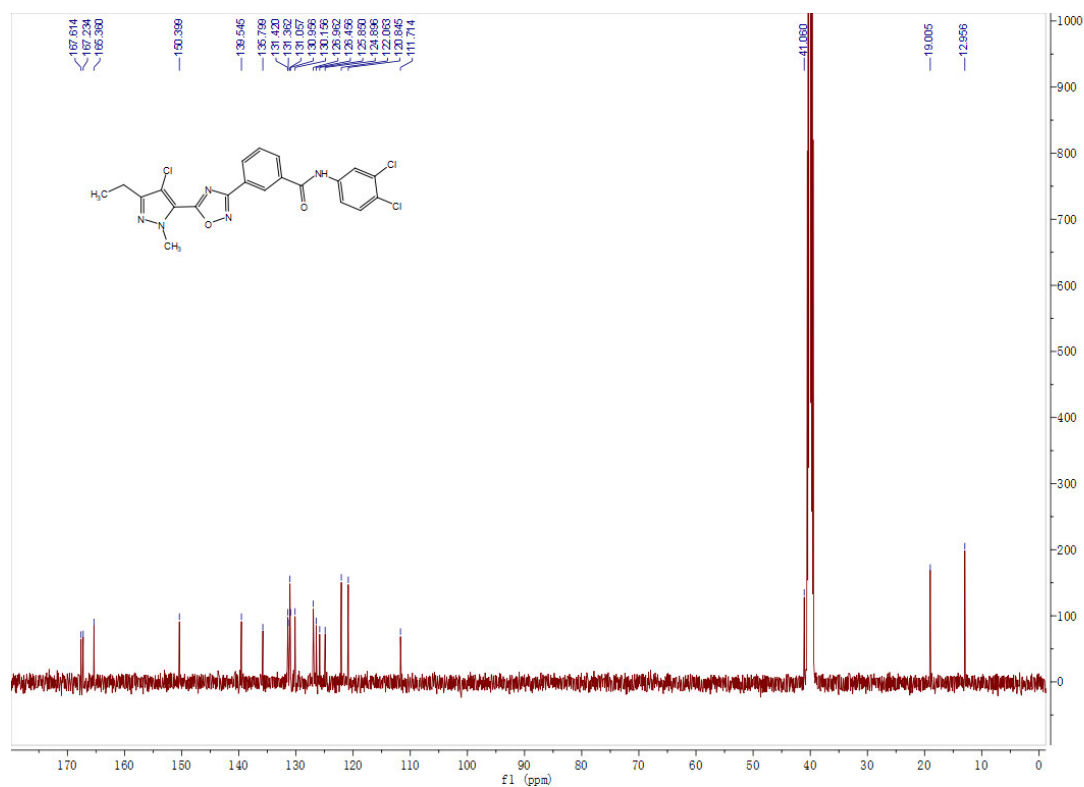

Figure S37. <sup>13</sup>C NMR spectra of 14r

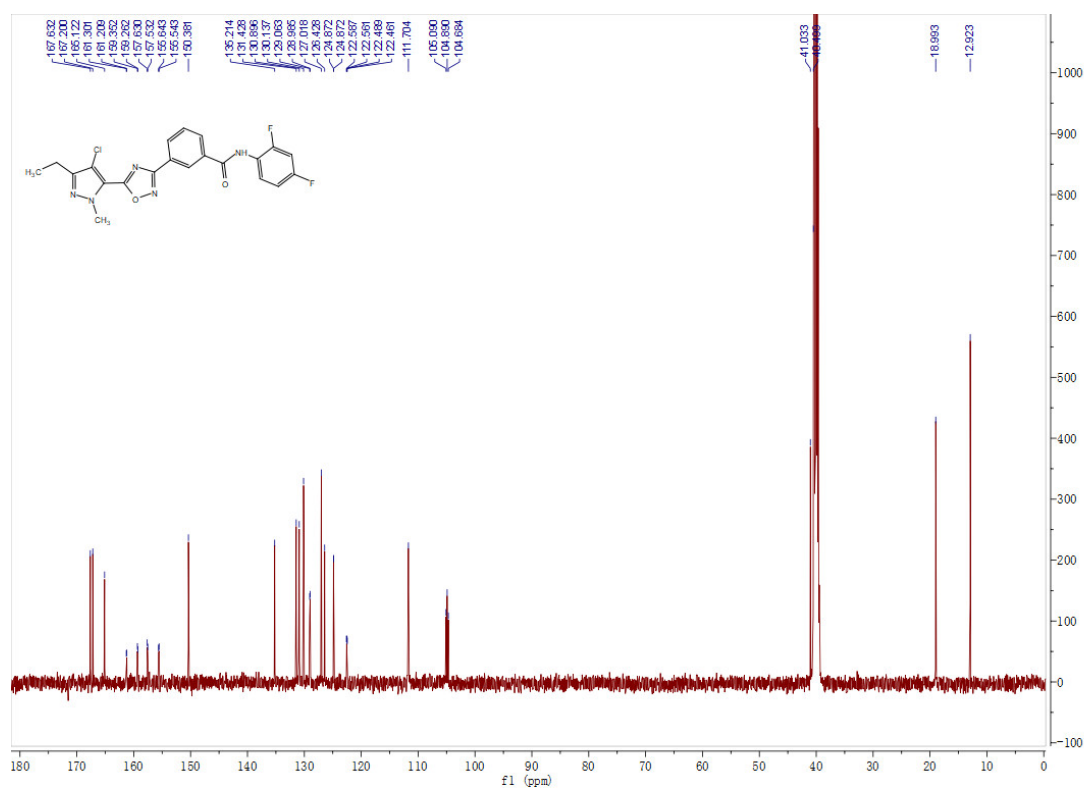

Figure S38. <sup>13</sup>C NMR spectra of 14s

### 3. ESI-HRMS spectra of 14a~14s

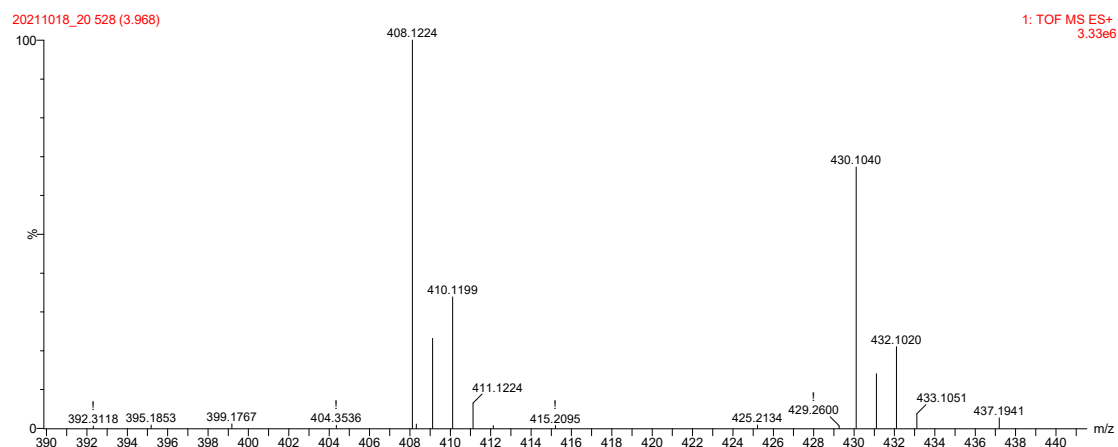

Figure S39. ESI-HRMS spectra of 14a

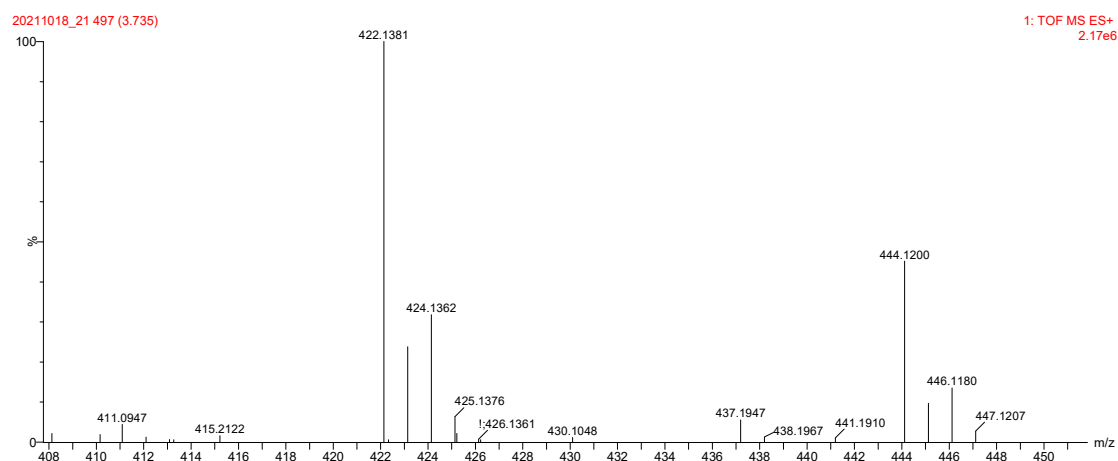

Figure S40. ESI-HRMS spectra of 14b

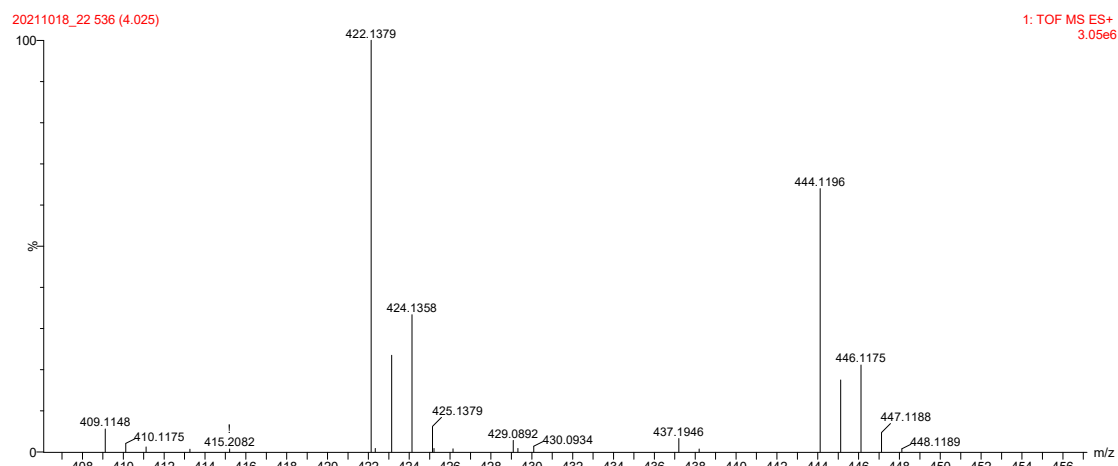

Figure S41. ESI-HRMS spectra of **14c**

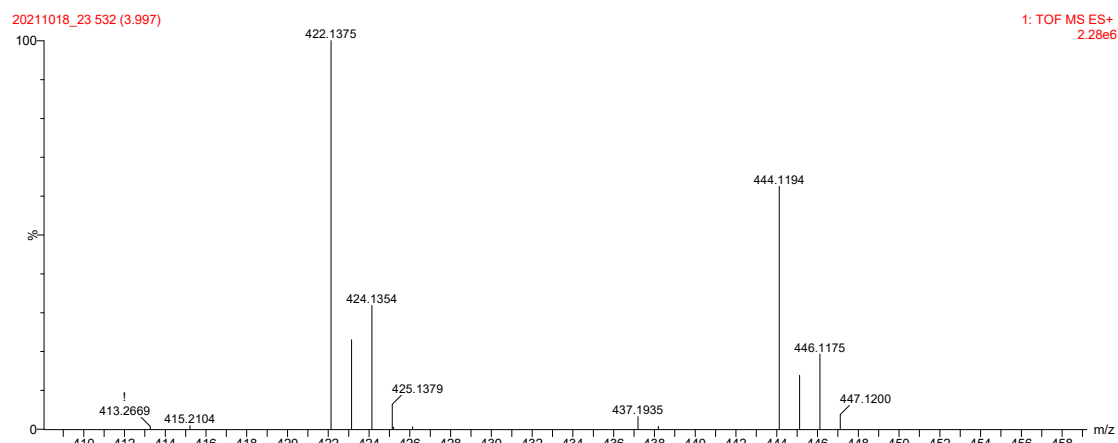

Figure S42. ESI-HRMS spectra of **14d**

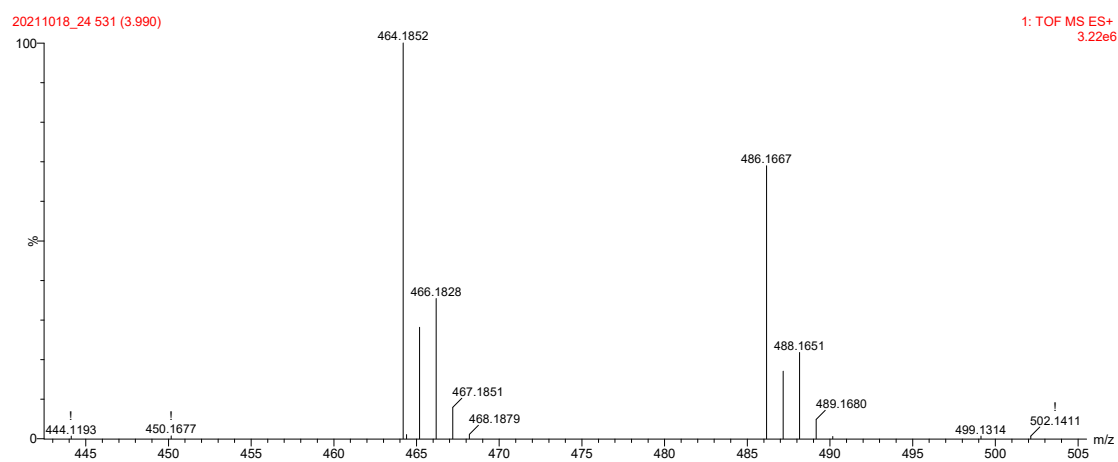

Figure S43. ESI-HRMS spectra of **14e**

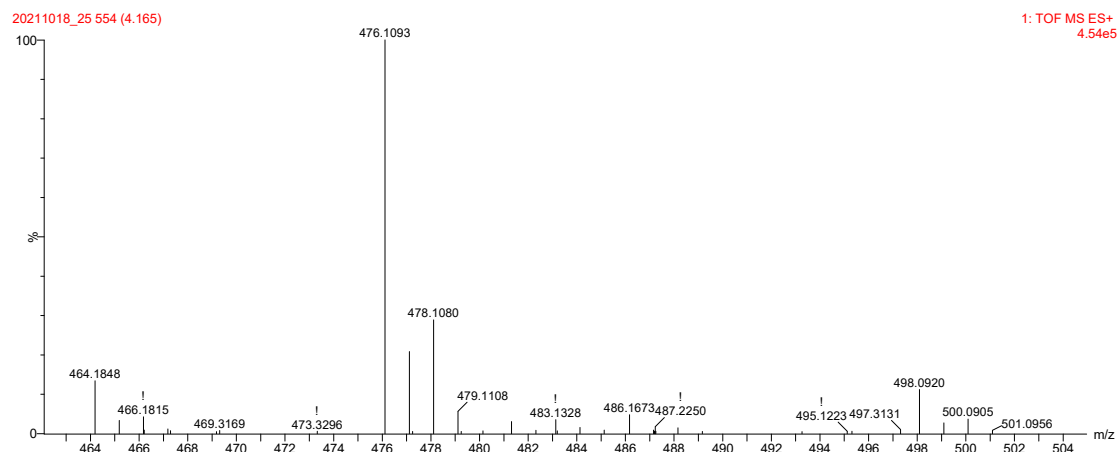

Figure S44. ESI-HRMS spectra of **14f**

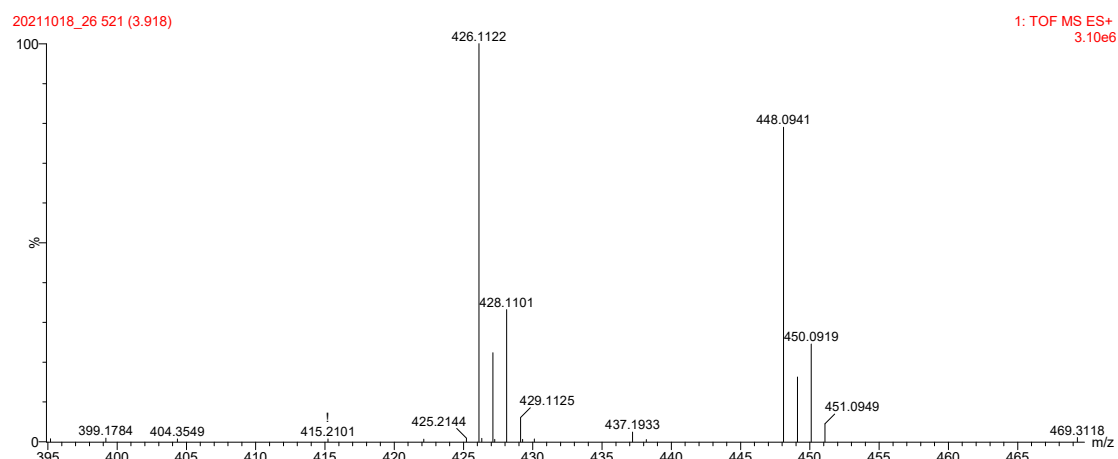

Figure S45. ESI-HRMS spectra of **14g**

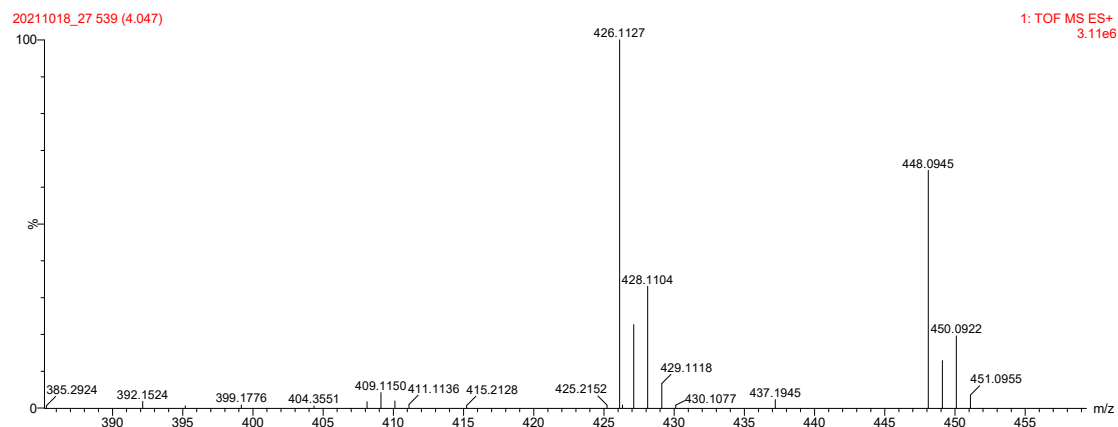

Figure S46. ESI-HRMS spectra of **14h**

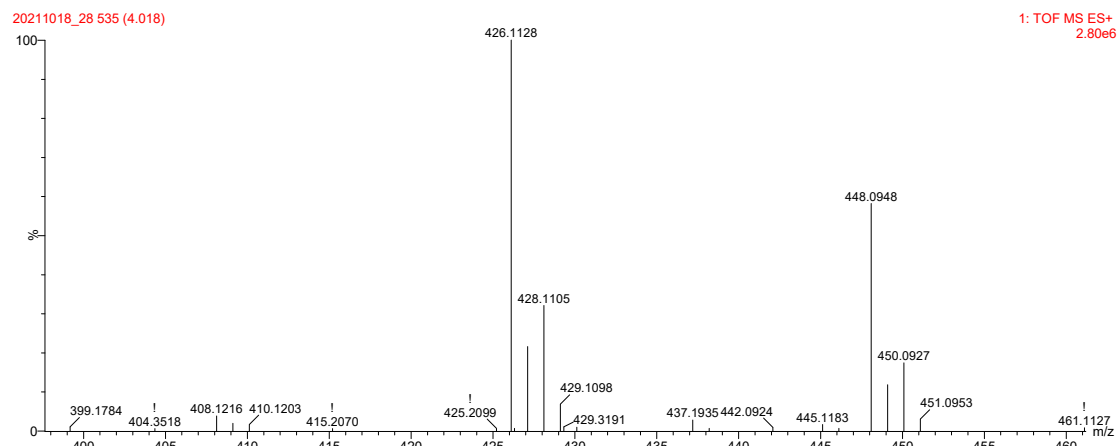

Figure S47. ESI-HRMS spectra of **14i**

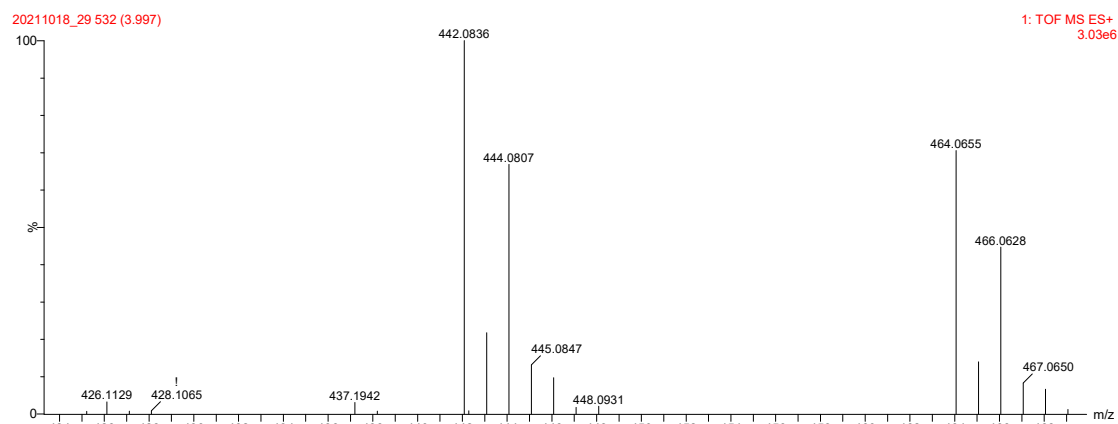

Figure S48. ESI-HRMS spectra of **14j**

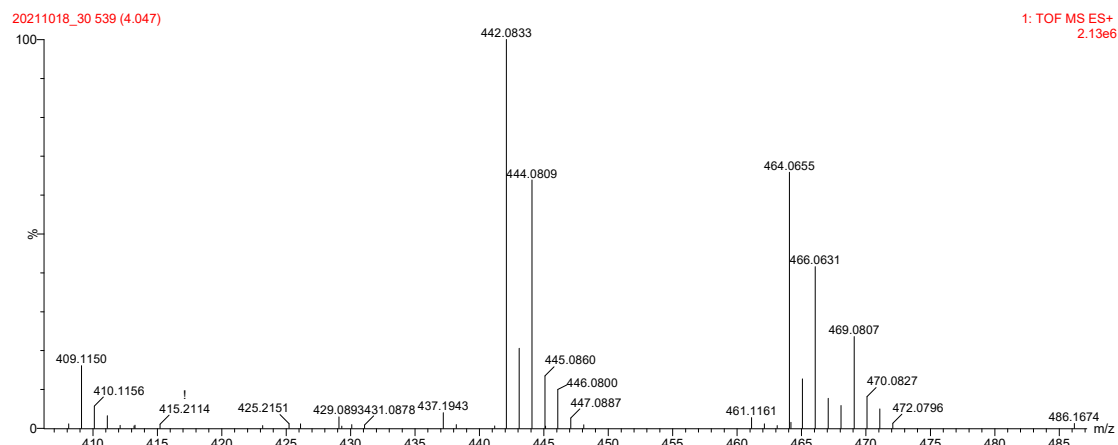

Figure S49. ESI-HRMS spectra of **14k**



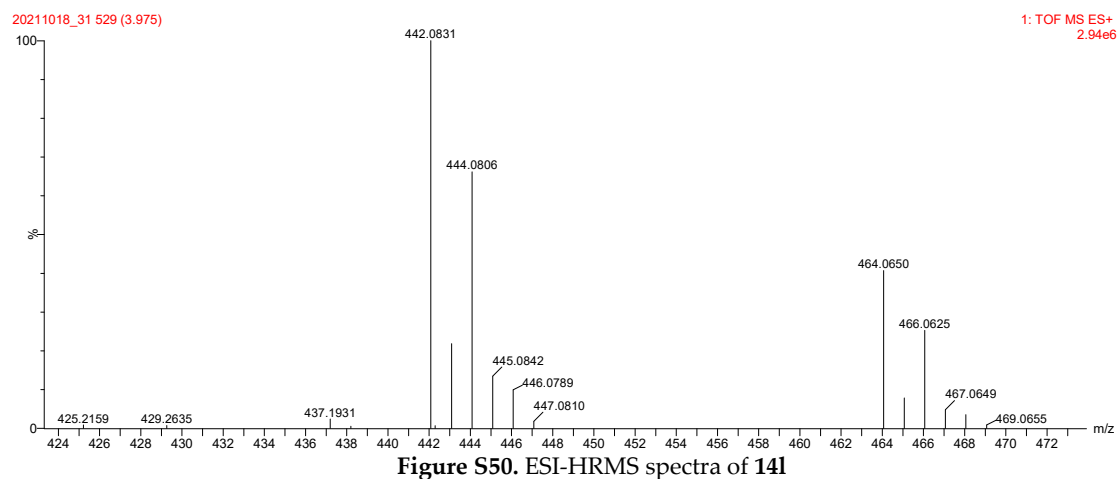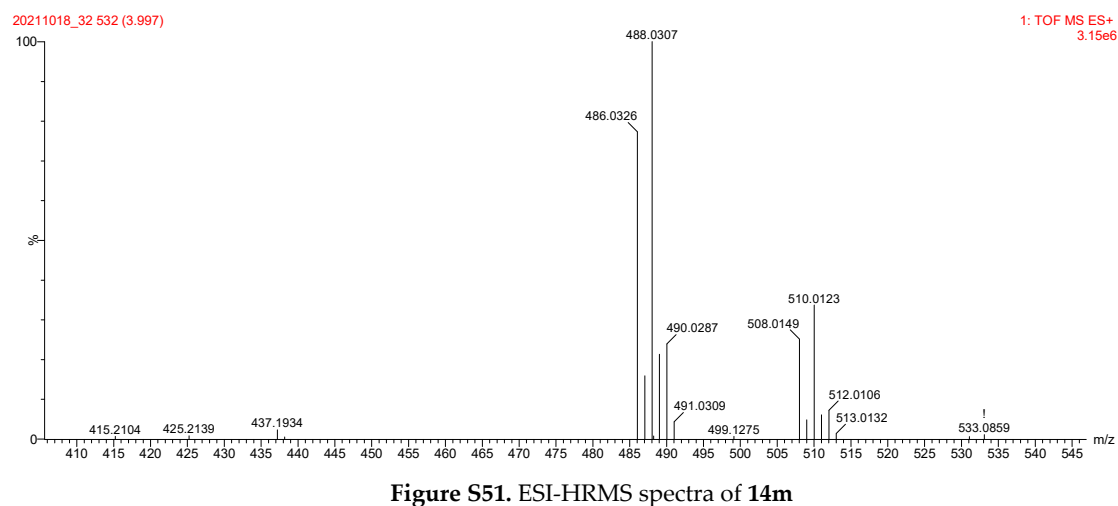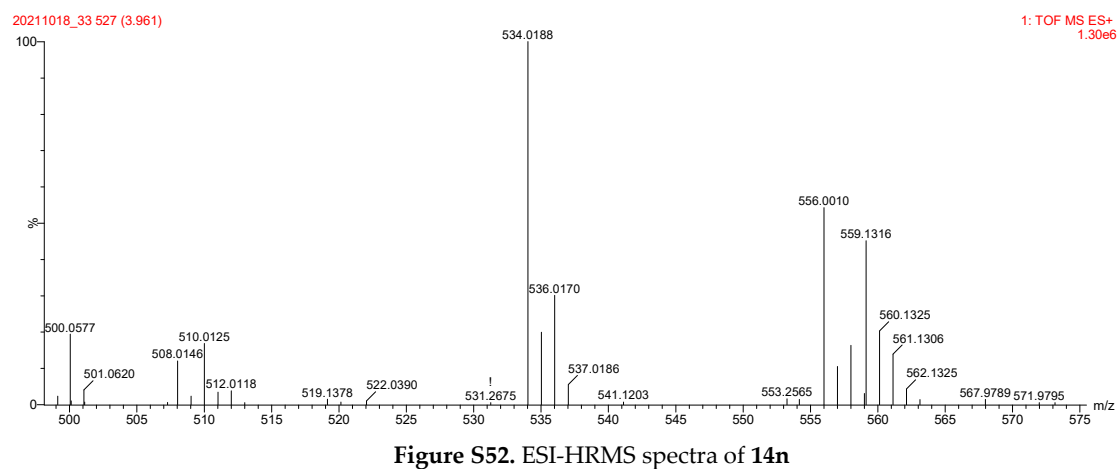

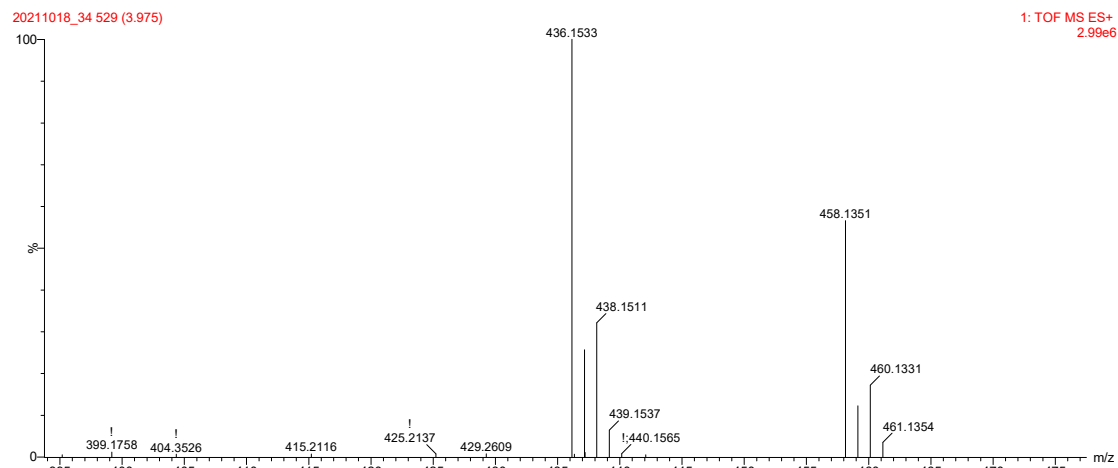

Figure S53. ESI-HRMS spectra of **14o**

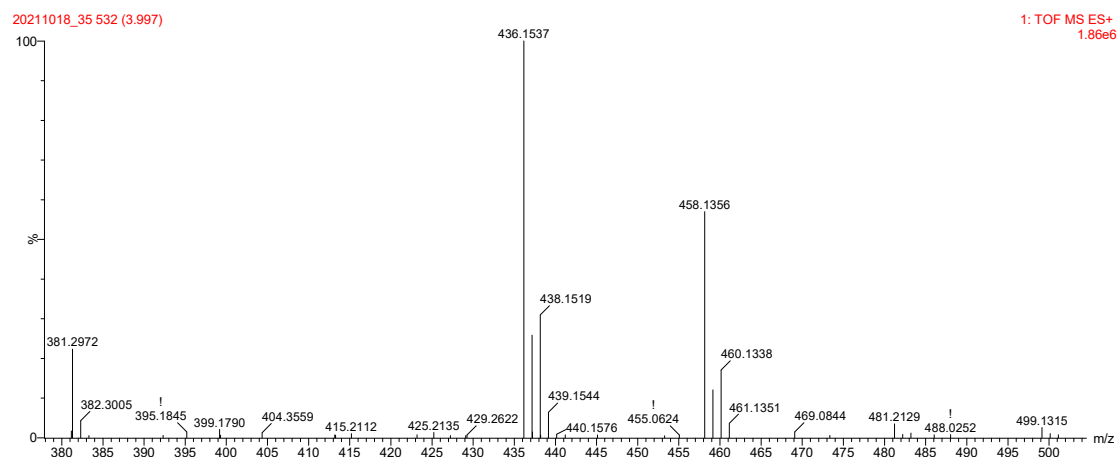

Figure S54. ESI-HRMS spectra of **14p**

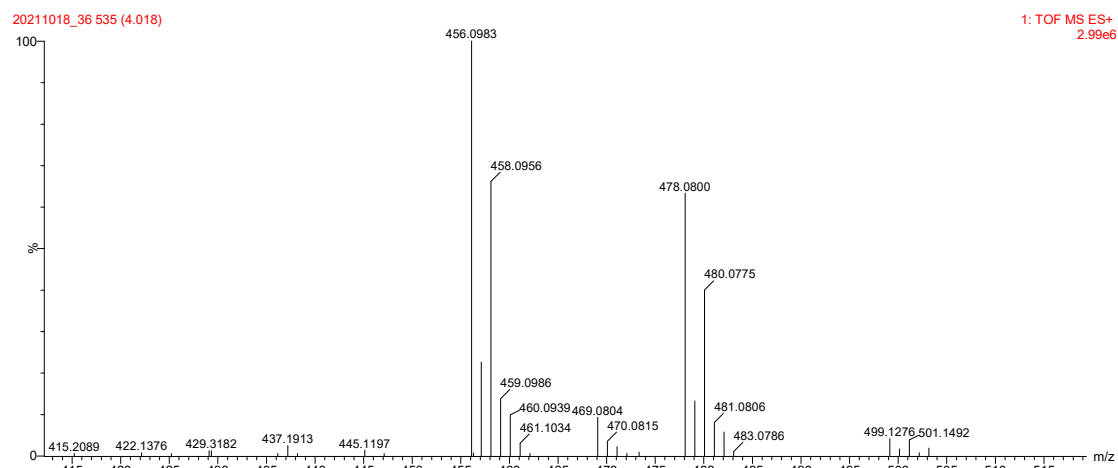

Figure S55. ESI-HRMS spectra of **14q**

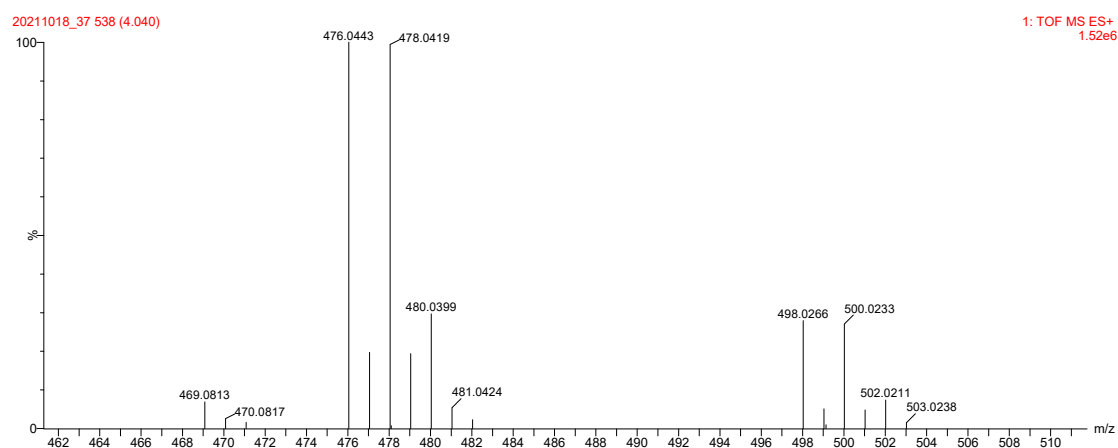

Figure S56. ESI-HRMS spectra of **14r**

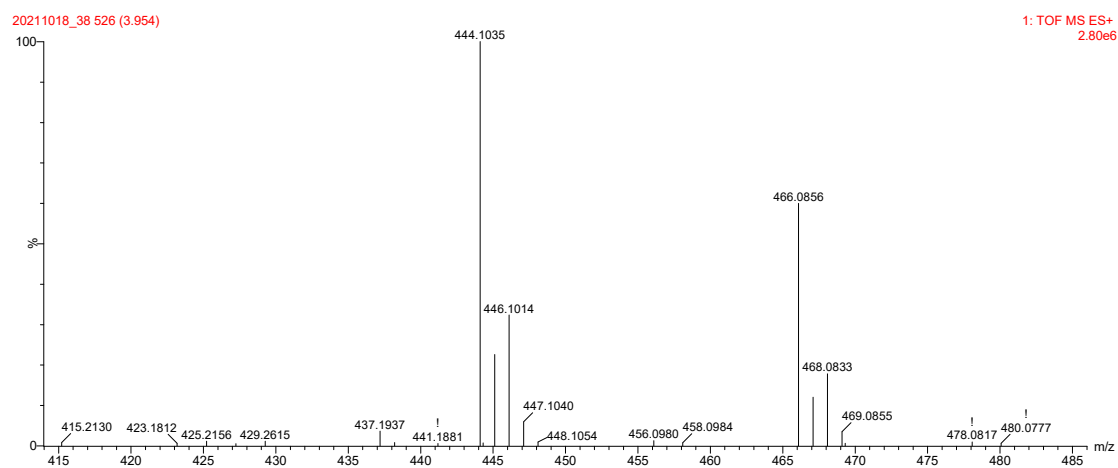

Figure S57. ESI-HRMS spectra of **14s**
